# Supplementary material for: Gamma Radiation- and Ultraviolet-Induced Polymerization of Bis(amino acid)fumaramide Gel Assemblies
Source: MDPI journal article supplement (doi:10.3390/polym14010214), 2022-01-05
Supplement: s1 [file s1]

**Gamma Radiation- and Ultraviolet-induced Polymerization of Bis(amino acid)fumaramide Gel Assemblies**

**Tomislav Gregorić<sup>1</sup>, Janja Makarević<sup>1</sup>, Zoran Šrefanić,<sup>2</sup> Mladen Žinić<sup>1,3</sup>, and Leo Frkanec<sup>1,\*</sup>**

<sup>1</sup>Laboratory of Supramolecular Chemistry, Division of Organic Chemistry and Biochemistry, Ruđer Bošković Institute, Bijenička c. 54, 10000 Zagreb, Croatia; tgregor@irb.hr

<sup>2</sup>Laboratory for chemical and biological crystallography, Division of Physical Chemistry, Ruđer Bošković Institute, Bijenička c. 54, 10000 Zagreb, Croatia, Zoran.Stefanic@irb.hr

<sup>3</sup>Croatian Academy of Sciences and Arts, Trg Nikole Šubića Zrinskog 11, HR-10000 Zagreb, Croatia; zinic@hazu.hr

\*Correspondence: frkanec@irb.hr; Tel.: +385 1 468 0217

**Table of content:**

1. <sup>1</sup>H-NMR, <sup>13</sup>C-NMR, HRMS spectra and FTIR data for compounds **1a** and **2a**
2. **Synthetic procedure**, NMR spectra and data, HRMS spectra for **1b**, and crystallographic data for **2b** (CCDC: 2124266)

**Figure S1:** MS scan UV polymerization reaction of bis (L-Leu) fumaramid methyl ester. Product of [2+2] cycloaddition m/z [M+H]<sup>+</sup>: C<sub>36</sub>H<sub>60</sub>N<sub>4</sub>O<sub>12</sub>, calculate: 741,42, found: 741,2.

**Scanning Electron Microscope (SEM) Investigation.**

**Figure S2** SEM micrography form obtained by gamma rays polymerization of **1a**/DMF-H<sub>2</sub>O gel network

**Figure S3;** SEM micrography of gamma rays polymerization of **1a**/DMF-H<sub>2</sub>O gel network on a glass slice

**Figure S4;** SEM micrography of product from the gamma rays polymerization **1a**/toluene gel network

**Figure S5;** SEM micrography of UV-rays polymerization from **1a**/DMF-H<sub>2</sub>O gel network.

**Figure S6;** SEM micrography of UV rays polymerization from **2a**/ toluene gel network

**Figure S7:** SEM micrography of UV polymerization CH<sub>2</sub>Cl<sub>2</sub> solution of compound **1a**

**3. FTIR Measurements**

**Table S2;** Characteristic FTIR bands (cm<sup>-1</sup>) of **1a**, **2a** (gel, crystal, product gamma, irradiation in solution).

**Figure S8.** Temperature dependent FTIR spectra of a) **1a**/toluene gel (ultrasound induced gelation) b) **1a**/toluene- $d_8$  gels (without application of ultrasound) in the temperature range of 20-95 °C and c) **1a**/toluene gel with 5 % mol benzophenone in the temperature range of 20-100 °C

#### 4. 2D NOESY spectra

**Figure S9** NMR; Selected region of 2D NOESY spectra of a) **1a**/toluene gel; b) **2a**/toluene gel; c) **1a**/DMF- $H_2O$  gel; [**A**=NH, **B**  $\underline{CH=CH}_{(fum)}$ , **C**  $O-\underline{CH=CH}_2$ , viny, **D**  $CH^*$ , **E** and **F**  $O-CH=\underline{CH}_2$ , viny] protons.

**Figure S10.** Distances H – H (vinyl ester : vinyl fum) in fully minimized the lowest energy conformations of **1a** (**C – B**: 6.6 – 6.8 Å; **E – B**: 5.6 – 6.7 Å; **F – B** 7.0 - 7.7 Å)

**Figure S11.** Distances H – H (vinyl ester : vinyl fum) in fully minimized the lowest energy conformations of **2a** (**C – B** 6.6 – 7.3 Å; **E – B** 6.0 – 6.3 Å; **F – B** 7.2 - 7.5 Å)

#### 5. Molecular modelling

**Figure S12.** Crystal structure of *N,N'*-bis[(2*S*)-1-methoxy-3-methyl-1-oxobutane-2-yl] fumaramide (**1b**); a bilayer of molecules linked by H-bonds (1D Fum NH – O=C); 3D all *i*-Bu groups (R-Leu) are oriented are oriented towards each other, OMe groups are located on the other side of the bilayer[71].

**Figure S13.** Crystal structure *N,N'*-bis[(2*S*)-1-methoxy-4-methyl-1-oxopentane-2-yl] fumaramide (**2b**) ( 1D H-bonds Fum NH – O=C); the layers are vertically oriented like a “herringbone” 3D *i*-Pr group (R-Val) together with OVin oriented in a “cavity”, OMe groups oriented towards to another OMe (CCDC: 2124266).

**Figure S14.** a) Distances reactive groups (C=C) under 4 Å in the model of favourable packing of the 6 molecules linked by amide H-bonds (NH-O = C) (**1a**) obtained by molecular modelling. Hydrogen atoms are omitted for clarity. b) enlarged part of the structure.

**Figure S15.** Distances reactive groups (C=C) ~ 4 Å in the model of favourable packing of the 6 molecules linked by amide H-bonds (NH-O = C) (**2a**) obtained by molecular modelling. Hydrogen atoms are omitted for clarity. b) enlarged part of the structure.

**Figure S16.** Hydrogen bond pattern in crystal structure of *N,N'*-bis[(2*S*)-1-methoxy-3-methyl-1-oxobutane-2-yl] fumaramide (**1b**).[71]

**Figure S17.** Hydrogen bond pattern in crystal structure of *N,N'*-bis[(2*S*)-1-methoxy-4-methyl-1-oxopentane-2-yl] fumaramide (**2b**) CCDC: 2124266.

**Figure S18** Temperature FTIR spectra **1a**/toluene- $d_8$  (c= 0.23 M) before heating (black) at 100 °C (red) and after cooling (blue)

**Figure S19** Temperature FTIR spectra **2a**/toluene- $d_8$  (c=4.2x10<sup>-2</sup> M) gels) before heating (black) at 100 °C (red) and after cooling (blue)

**Figure S20.** Selected region of 2D NOESY spectra of **2a**/toluene gel at 40 °C; [**A**=NH, **B**  $\underline{CH=CH}_{(fum)}$ , **C**  $O-\underline{CH=CH}_2$ , viny, **D**  $CH^*$ , **E** and **F**  $O-CH=\underline{CH}_2$ , viny] protons

1.  $^1\text{H}$ -NMR,  $^{13}\text{C}$ -NMR, HRMS spectra and FTIR data for compounds **1a** and **2a**

***N,N'*-bis[(2*S*)-1-vinyloxy-4-methyl-1-oxopentane-2-yl] fumaramide (**1a**)**

White powder 221 mg (56 %, yield) M.p.=177 - 179 °C (CH<sub>3</sub>CN), [ $\alpha$ ]<sub>D</sub> = - 54,5 ( $\gamma$  = 1 g/mL, MeOH);

$^1\text{H}$  NMR (600 MHz, DMSO-*d*<sub>6</sub>, 20 °C):  $\delta$  = 8.95 (2H, d,  $J$  = 6 Hz NH), 7.21 (2 H, dd,  $J$ =6.2,  $J$ =13.9, OCH=CH<sub>2</sub>), 6.92 (2H, s, HC=CH), 4.96 (2H, dd,  $J$ =1.9,  $J$ =13.9, OCH=CH<sub>A</sub>H<sub>B</sub>), 4.73 (2H, dd,  $J$ =1.9,  $J$ =6.2, OCH=CH<sub>A</sub>H<sub>B</sub>), 4.43-4.39 (2 H, m, CH<sub>α</sub>), 1.67-1.56 (6 H, m, CH<sub>2,β</sub> and CH<sub>γ</sub>), 0.92 (6H, dd,  $J$ =6.2, CH<sub>3,δ</sub>), 0.87 (6H, dd,  $J$ =6.2, CH<sub>3,δ</sub>) ppm.  $^{13}\text{C}$  NMR (75 MHz, DMSO-*d*<sub>6</sub>, 20 °C):  $\delta$  =170.1 (COO), 164.3 (CON), 141.7 (OCH=CH<sub>2</sub>) 132.9 (HC=CH), 99.6 (OCH=CH<sub>2</sub>), 51.0 (CH<sub>α</sub>), 39.6 (CH<sub>2,β</sub>), 24.8 (CH<sub>γ</sub>), 23.1, 21.6 (CH<sub>3,δ</sub>) ppm; FTIR (KBr)  $\nu_{\text{max}}/\text{cm}^{-1}$  = 3320 (NH), 1755 (OC=O), 1630 (HNC=O, amide I), 1538 (HNC=O, amide II)

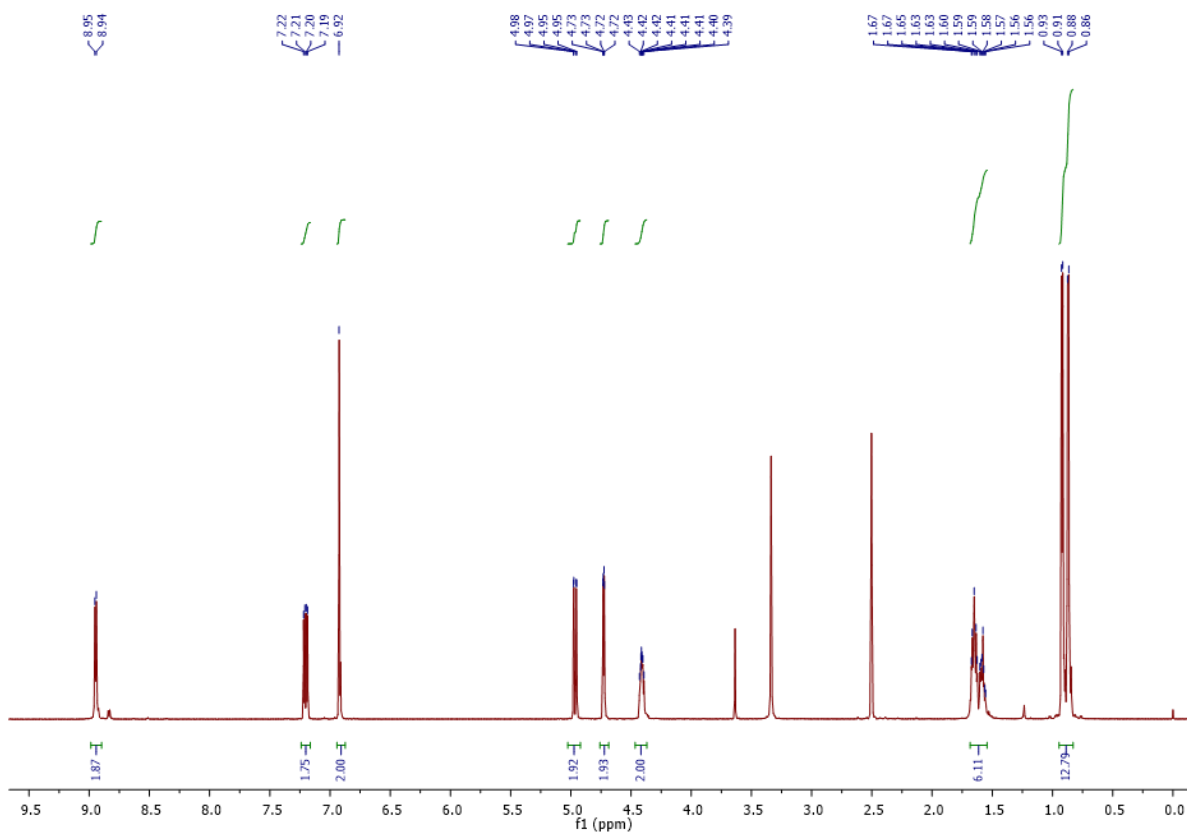

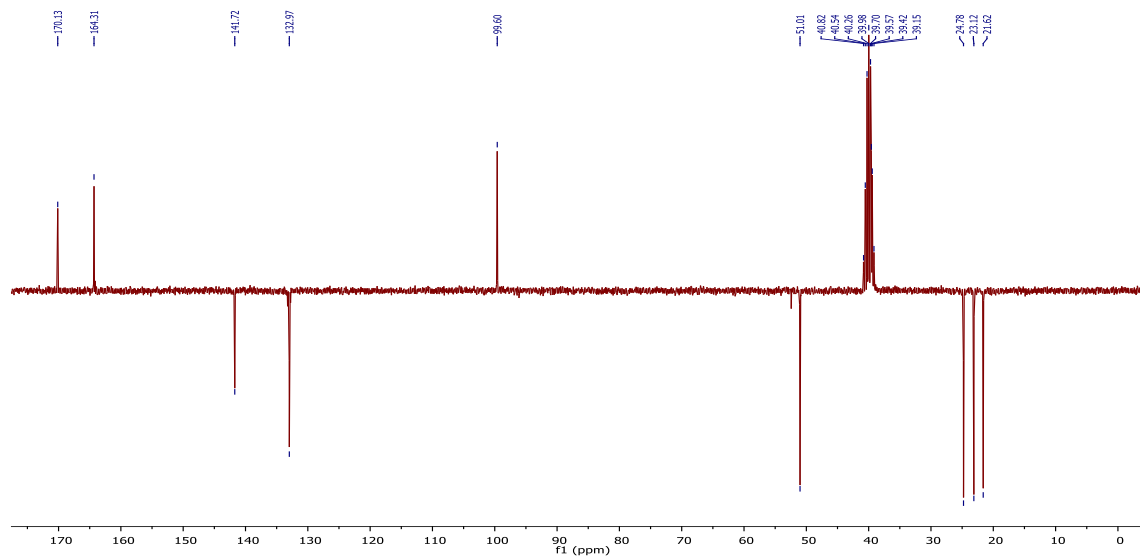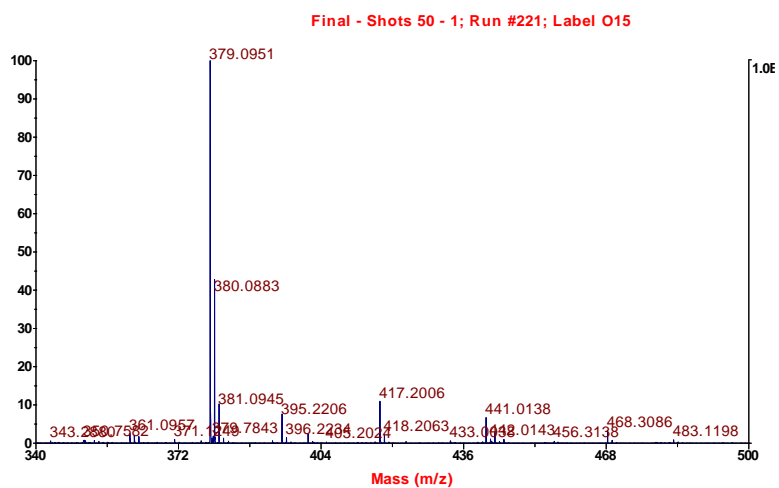

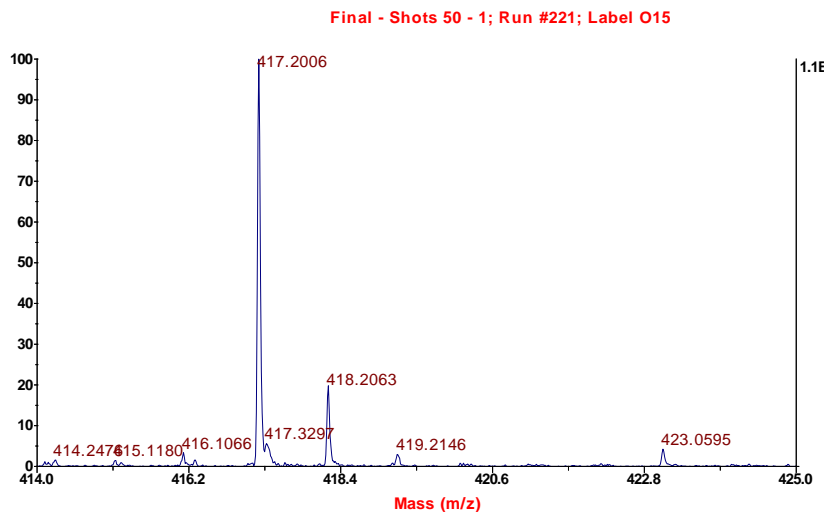

HRMS:  $m/z$   $[M+Na]^+$ :  $C_{20}H_{30}N_2O_6$ , calculate: 417.2002, found: 417.2006.

*N,N'*-bis[(2*S*)-1-vinyloxy-3-methyl-1-oxobutane-2-yl] fumaramide (**2a**)

White powder 205 mg (55.9 %, yield), MP=175–176 °C ( $CH_3CN$ ),  $[\alpha]_D = -68.5$  ( $\gamma = 1$  g/mL, MeOH);

$^1H$  NMR (300 MHz,  $CDCl_3$ , 20 °C):  $\delta$  = 7.24 (2 H, dd,  $J$ =6.2 Hz,  $J$ =13.9 Hz,  $OCH=CH_2$ ), 7.1 (2H, s,  $HC=CH$ ), 6.91 (2 H, d,  $J$ = 9 Hz, NH), 4.95 (2H, dd,  $J$ =1.7,  $J$ =13.9,  $OCH=CH_AH_B$ ), 4.79 (2 H, dd,  $J$ = 5.0 Hz,  $J$ = 9.0 Hz,  $CH_\alpha$ ), 4.65 (2H, dd,  $J$ = 1.8 Hz,  $J$ = 6.2 Hz,  $OCH=CH_AH_B$ ), 2.32-2.25 (2 H, m,  $CH_\beta$ ), 1.00 (6H, 2d,  $J$ = 6.9 Hz,  $CH_{3,\delta}$ ); 0.97 (6H, 2d,  $J$ = 6.9 Hz,  $CH_{3,\delta}$ ) ppm.  $^{13}C$  NMR (75.5 MHz,  $CDCl_3$ , 20 °C):  $\delta$  =168.9 (COO), 164.8 (CON), 140.8 ( $OCH=CH_2$ ) 133.3 ( $HC=CH$ ), 99.0 ( $OCH=CH_2$ ), 57.1 ( $CH_\alpha$ ), 31.4 ( $CH_{2,\beta}$ ), 18.9 ( $CH_{3,\gamma}$ ), 17.7 ( $CH_{3,\gamma}$ ) ppm.; FTIR (KBr)  $\nu_{max}/cm^{-1}$  = 3267 (NH), 1750 (OC=O), 1637 (HNC=O, amide I), 1553 (HNC=O, amide II)

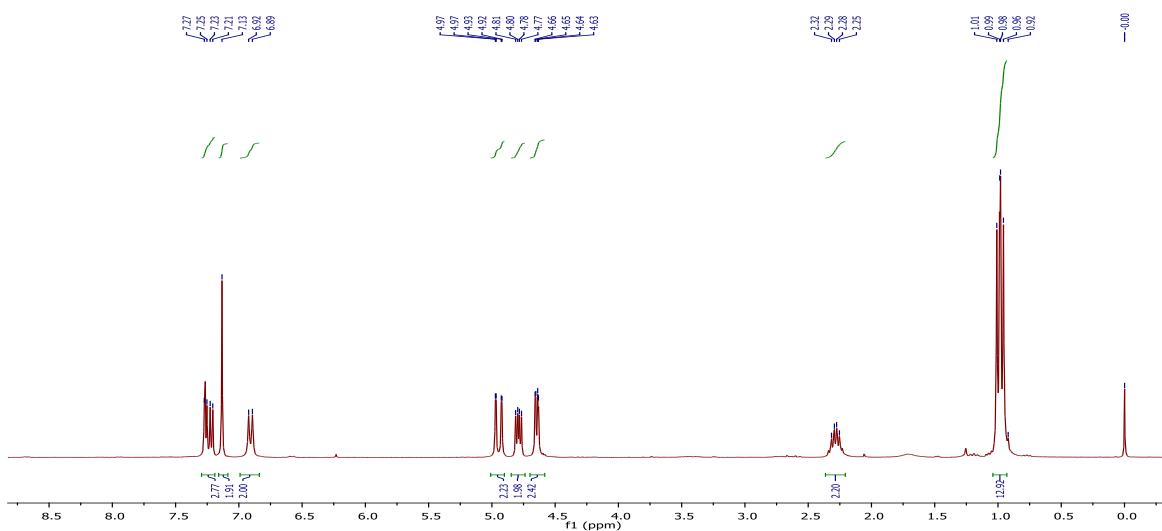

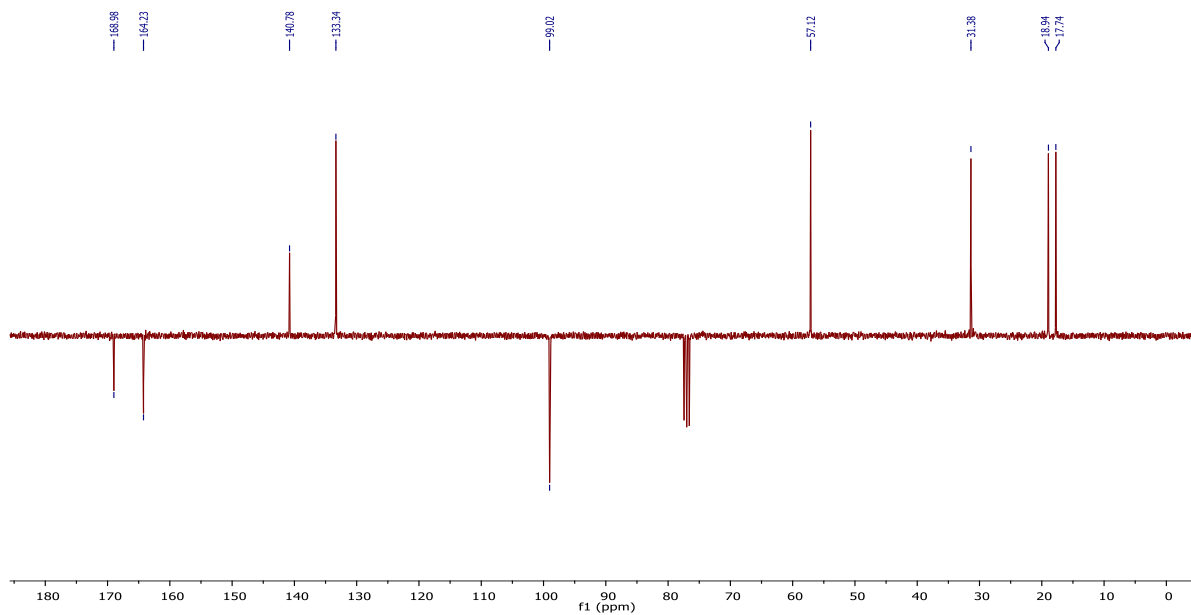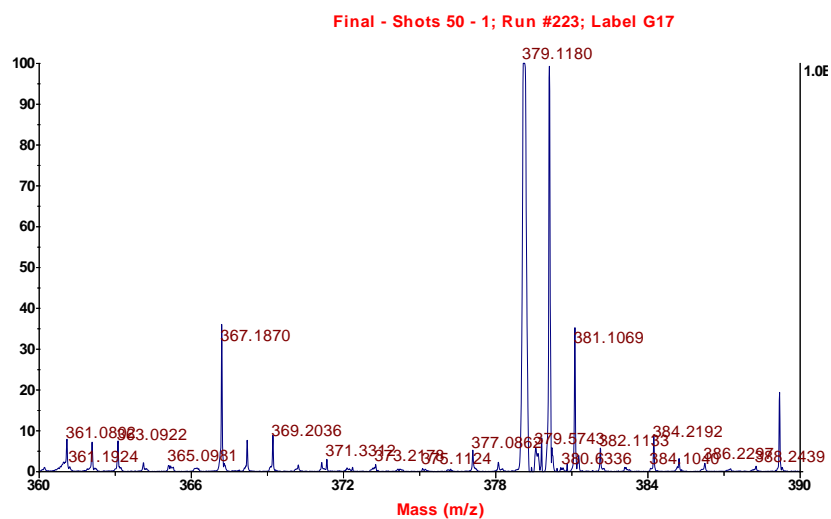

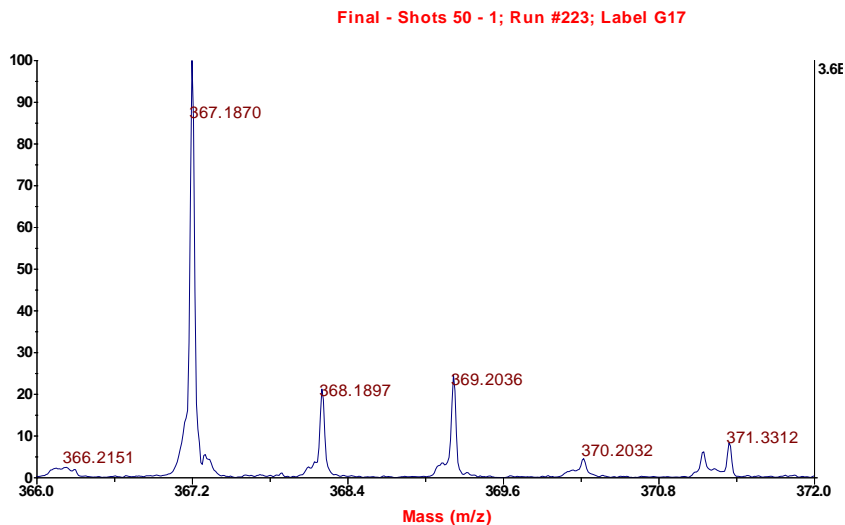

HRMS:  $m/z$   $[M+H]^+$ :  $C_{18}H_{26}N_2O_6$ , calculate: 367.1869, found: 367.1870.

## 2 Synthetic procedure for methyl ester bis(Leu and Val) fumaramides (**1b** and **2b**)

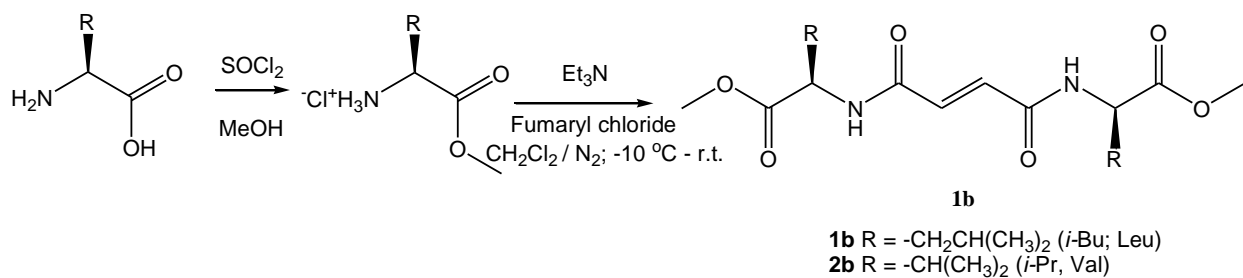

**Scheme S1.** Synthesis of bis(amino acid)fumamide methyl esters **1b** and **2b**.

*N,N'*-bis[(2S)-1-methoxy-3-methyl-1-oxobutane-2-yl] fumaramide (**1b**)[69]

Compound **1b** was synthesized according to general procedure. White powder 123.9 mg was obtained in a yield of 45.7 %. The NMR spectra of the obtained product correspond to the data from the literature.[69]

$^1\text{H}$  NMR (300 MHz,  $\text{DMSO-d}_6$ ):  $\delta$  = 8.80 (2H, d, NH,  $J$  = 7.7 Hz), 6.90 (2H, s, HC=CH), 4.41-4.34 (2H, m,  $\text{CH}\alpha$ ), 3.32 (6H, s, OCH<sub>3</sub>) 1.63-1.52 (2H, m,  $\text{CH}\beta$  i CH<sub>2</sub>), 0.87 (12H, dd, CH<sub>3</sub>,  $J$  = 6.2 Hz,  $J$  = 14.5 Hz) ppm;  $^{13}\text{C}$  NMR (75 MHz,  $\text{DMSO-d}_6$ ):  $\delta$  = 172.6 (C=O), 163.7 (NHC=O), 132.5 (HC=CH), 51.9 ( $\text{CH}\alpha$ ), 50.5 (OCH<sub>3</sub>), 39.8 (CH<sub>2</sub>), 29.6 ( $\text{CH}\beta$ ), 22.6 (CH<sub>3</sub>), 21.1 (CH<sub>3</sub>) ppm.; FTIR (KBr)  $\nu_{\text{max}}/\text{cm}^{-1}$  = 3300 (NH), 1751 (OC=O), 1732 (OC=O), 1633 (HNC=O, amide I), 1534 (HNC=O, amide II).

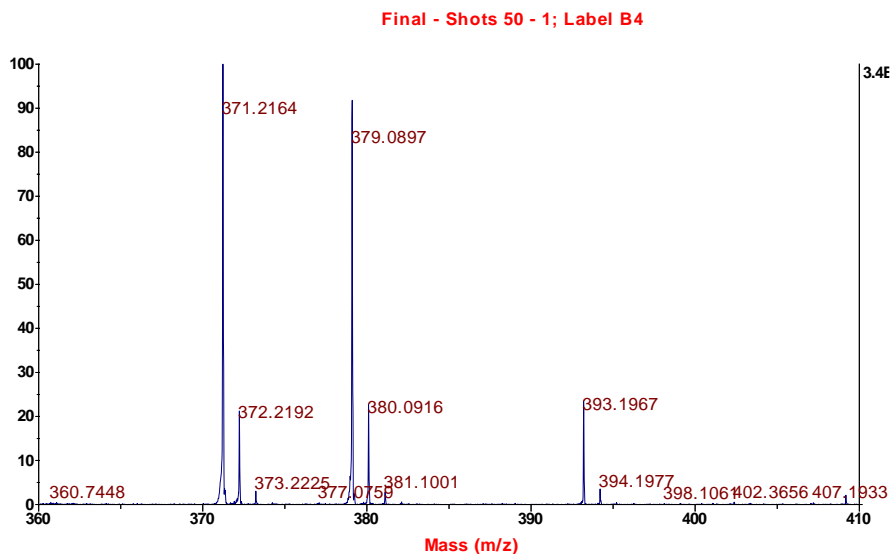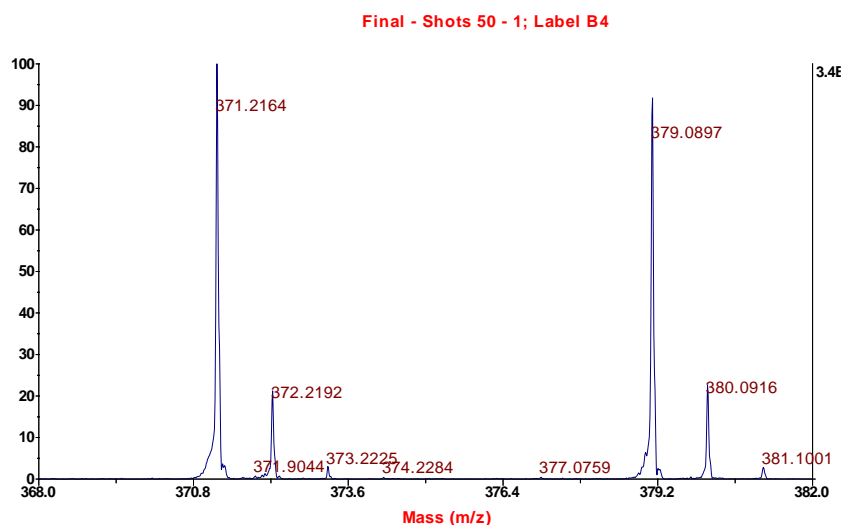

HRMS:  $m/z$   $[M+H]^+$ :  $C_{18}H_{30}N_2O_6$ , calculate: 371.2182, found: 371.2164.

*N,N'*-bis[(2*S*)-1-methoxy-4-methyl-1-oxopentane-2-yl] fumaramide (**2b**)[70]

Compound **2b** was synthesized according to general procedure starting from L-Valine (234 mg, 2 mmol). White powder 125 mg was obtained in a yield of 53.5 %. The spectral data were consistent with those reported in the literature. [70]. Single crystal **1b** for X-ray diffraction analysis was obtained by recrystallization by slow evaporation from methanol (MeOH). Crystallographic data of **2b** have been deposited in the Cambridge Crystallographic Data Center under accession number **CCDC: 2124266**.

**Crystallographic data** for: *N,N'*-bis[(2*S*)-1-methoxy-4-methyl-1-oxopentane-2-yl] fumaramide **2b**



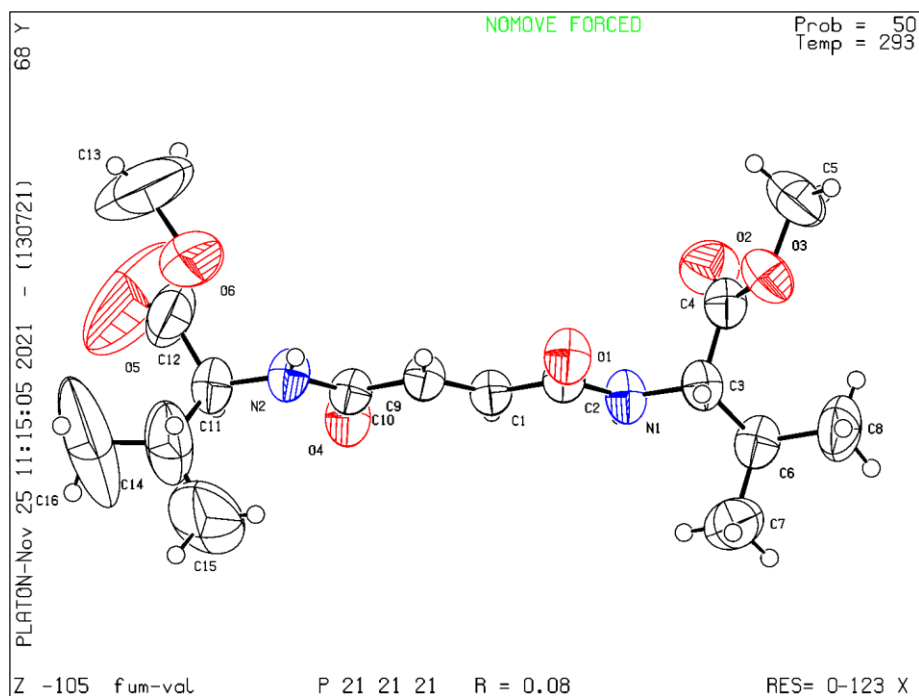

**Figure CD1.** Structure of title compound shown with probability ellipsoids at 50% level. It is visible that one side is highly disordered, while the other is completely ordered.

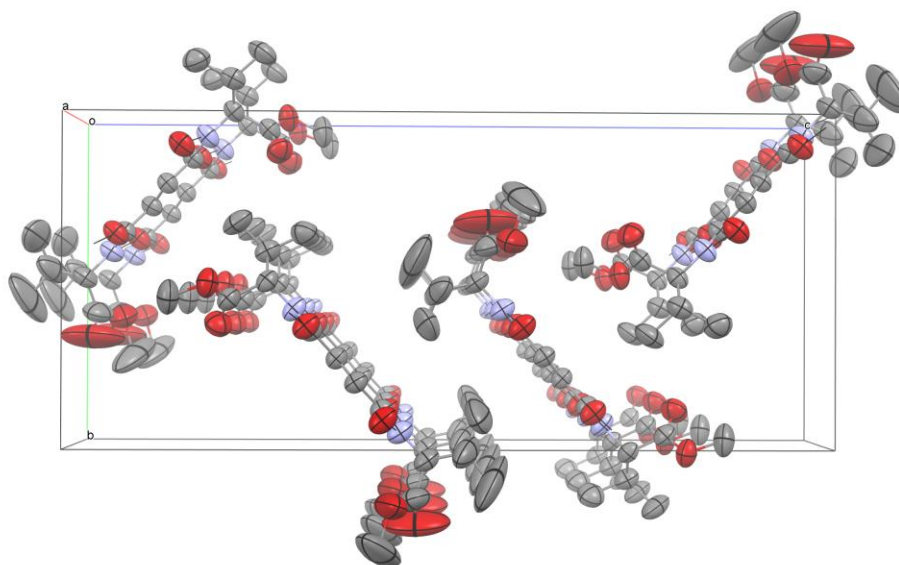

**Figure CD2.** The packing of molecules in the direction of crystallographic b axis. Molecules are connected by N-H...O hydrogen bonds in the direction of crystallographic b axis.

**Table CD1.** Crystallographic data collection and refinement data for the structure (CCDC: 2124266).

|                                                   |                                                               |
|---------------------------------------------------|---------------------------------------------------------------|
| Formula                                           | C <sub>16</sub> H <sub>26</sub> N <sub>2</sub> O <sub>6</sub> |
| Formula Weight                                    | 342.35                                                        |
| Crystal System                                    | orthorhombic                                                  |
| Space group                                       | <i>P</i> 2 <sub>1</sub> 2 <sub>1</sub> 2 <sub>1</sub>         |
| <i>a</i> , <i>b</i> , <i>c</i> [Å]                | 4.9093(3) 13.1211(12) 30.031(3)                               |
| <i>V</i> [Å <sup>3</sup> ]                        | 1934.5(3)                                                     |
| <i>Z</i>                                          | 4                                                             |
| <i>D</i> (calc) [g/cm <sup>3</sup> ]              | 1.176                                                         |
| <i>μ</i> (CuKα) [mm <sup>-1</sup> ]               | 0.750                                                         |
| <i>F</i> (000)                                    | 736                                                           |
| Crystal Size [mm]                                 | 0.05 x 0.1 x 0.2                                              |
| <b>Data Collection</b>                            |                                                               |
| Temperature (°K)                                  | 293                                                           |
| Radiation [Å]                                     | CuKα 1.54184                                                  |
| Theta Min-Max [°]                                 | 2.9, 76.0                                                     |
| Dataset                                           | -3: 6 ; -14: 16 ; -37: 34                                     |
| Tot., Uniq. Data, <i>R</i> <sub>int</sub>         | 5949, 3646, 0.025                                             |
| Observed data [ <i>I</i> > 2.0 sigma( <i>I</i> )] | 2695                                                          |
| <b>Refinement</b>                                 |                                                               |
| <i>N</i> <sub>ref</sub> , <i>N</i> <sub>par</sub> | 3646, 224                                                     |
| <i>R</i> , <i>wR</i> <sup>2</sup> , <i>S</i>      | 0.0781, 0.2557, 1.07                                          |
| Flack <i>x</i>                                    | 0.3(2)                                                        |
| Min. and Max. Resd. Dens. [e/Å <sup>3</sup> ]     | -0.22, 0.52                                                   |

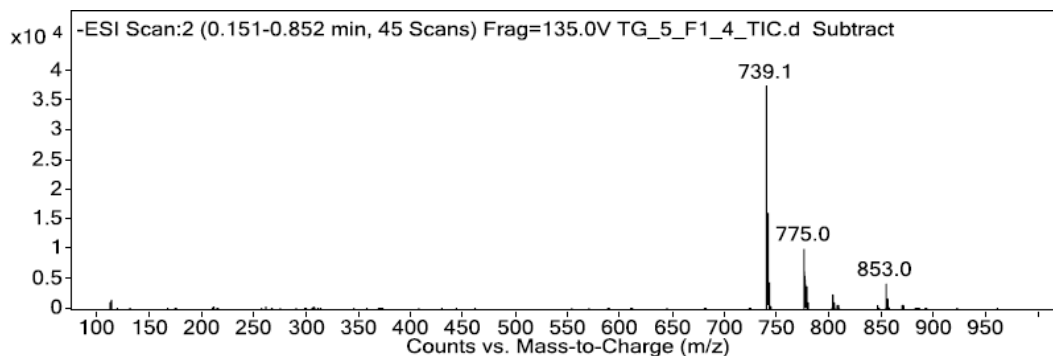

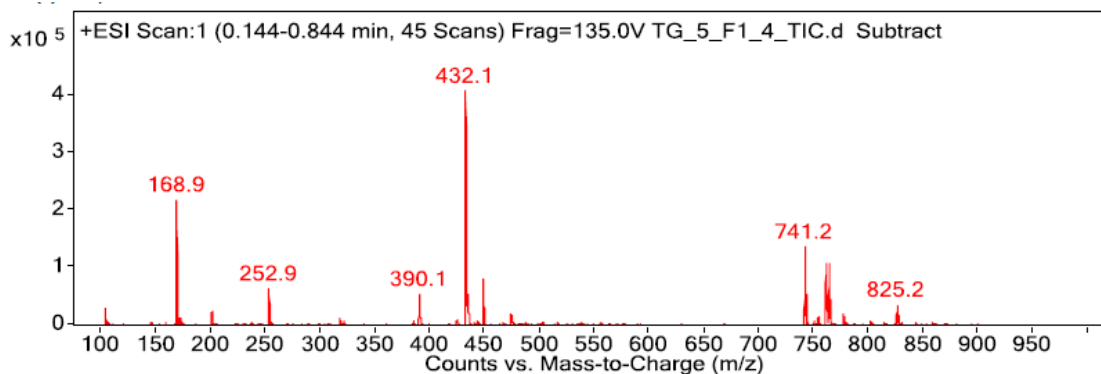

**Figure S1:** MS scan of UV polymerization reaction of bis (L-Leu) fumaramide methyl ester (**2a**). Product of [2+2] cycloaddition  $m/z$   $[M+H]^+$ :  $C_{36}H_{60}N_4O_{12}$ , calculate: 741.42, found: 741.2.

### 3. Scanning Electron Microscope (SEM) Investigation.

JEOL scanning electron microscope (SEM, Model JSM 5500LV) was used to study the fractured surface of the samples. The samples were first dipped into liquid nitrogen and snapped to half to prepare the fractured surfaces. Then, samples were mounted on the sample stub and were sputtered with gold. Property Testing of the produced composites was conducted in.

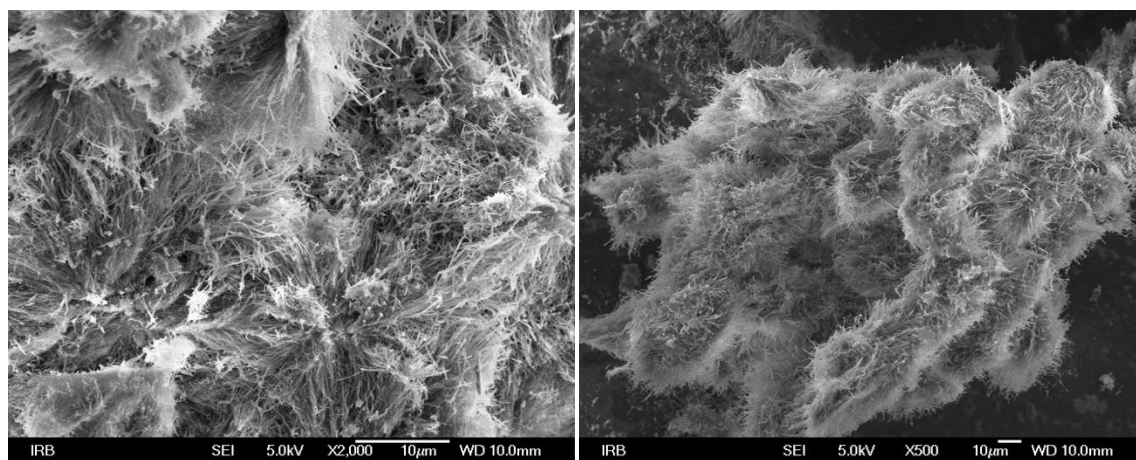

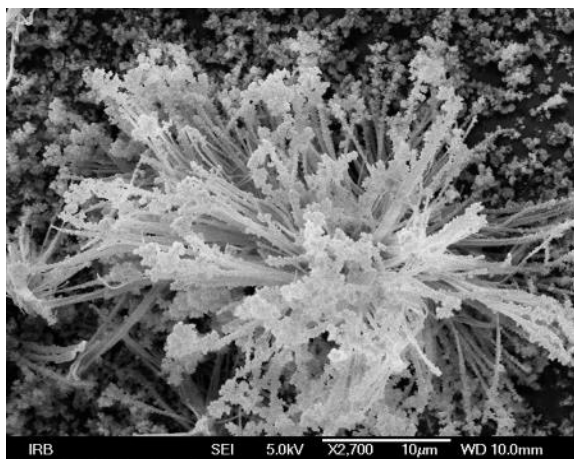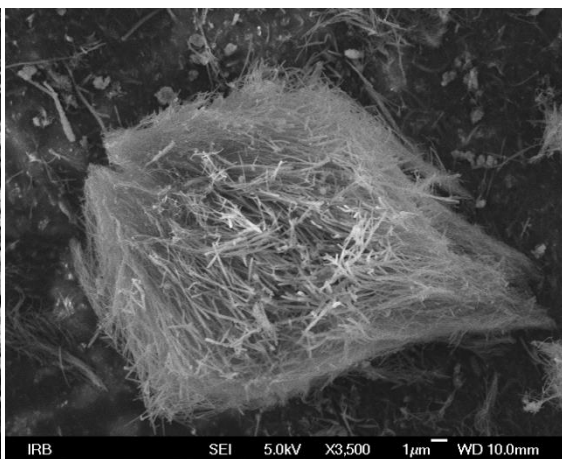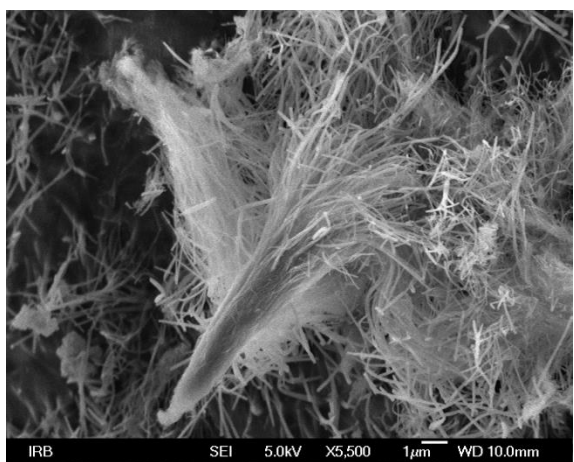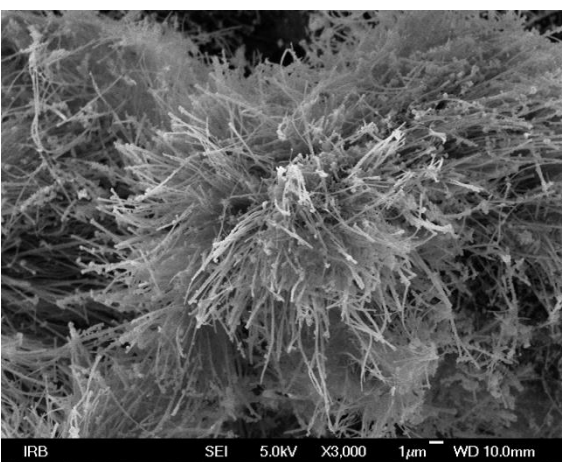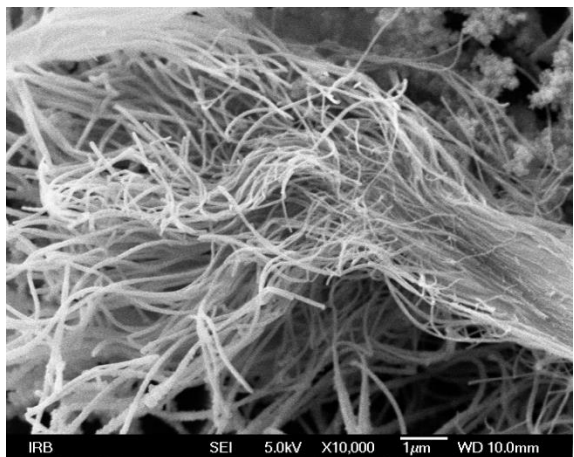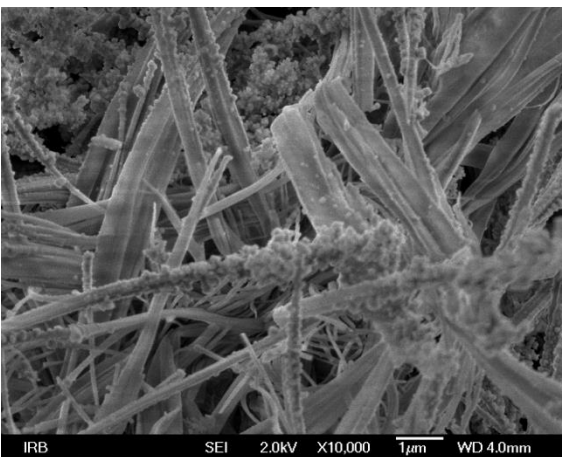

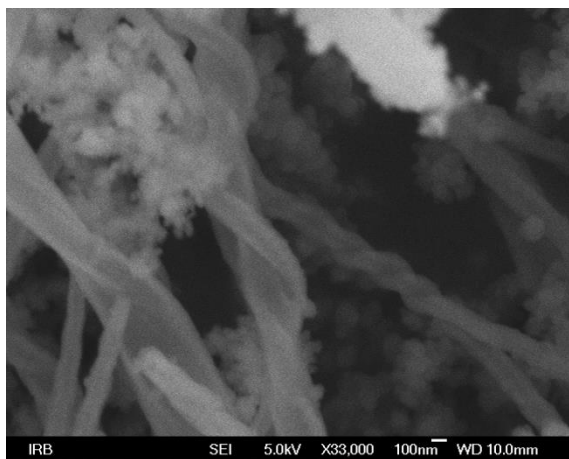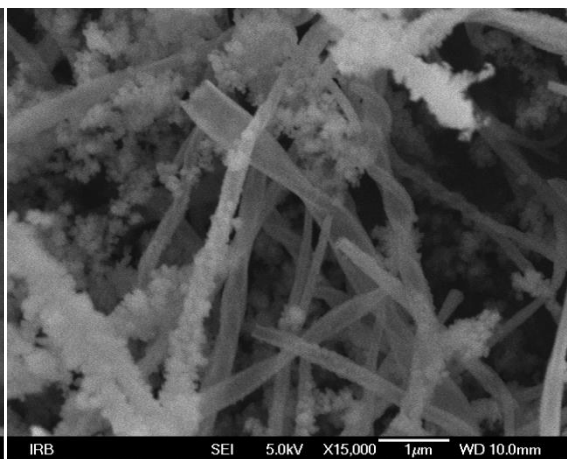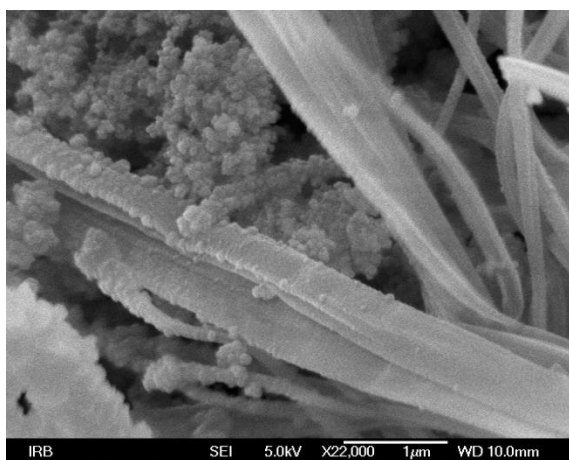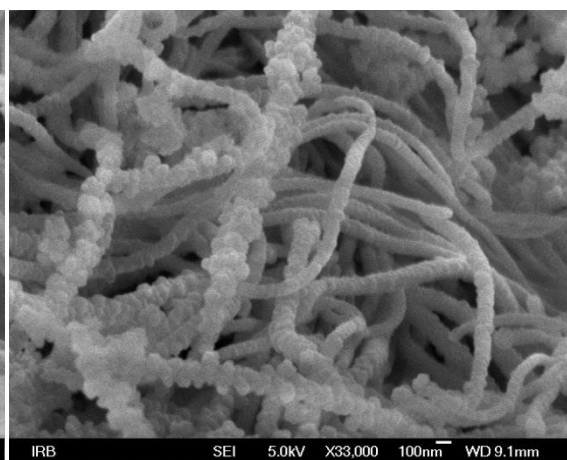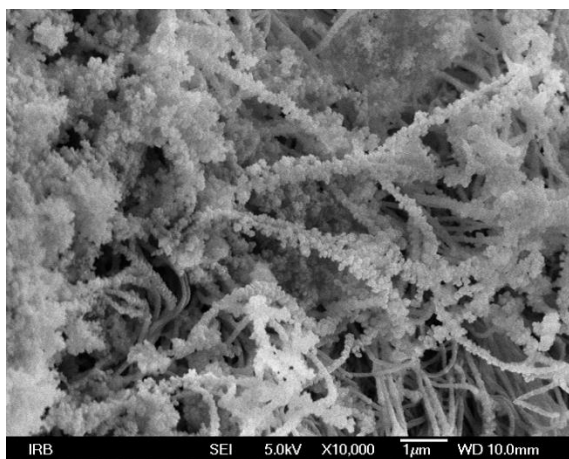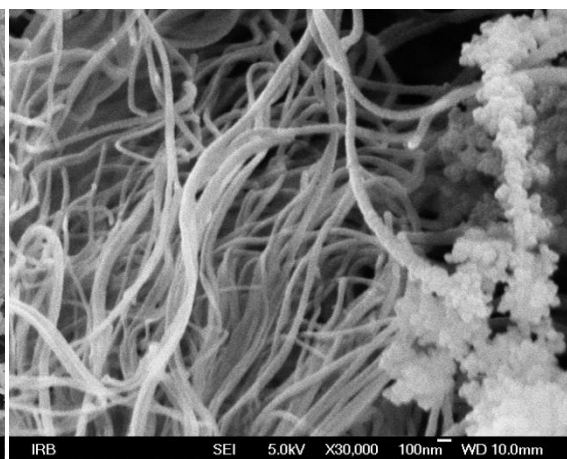



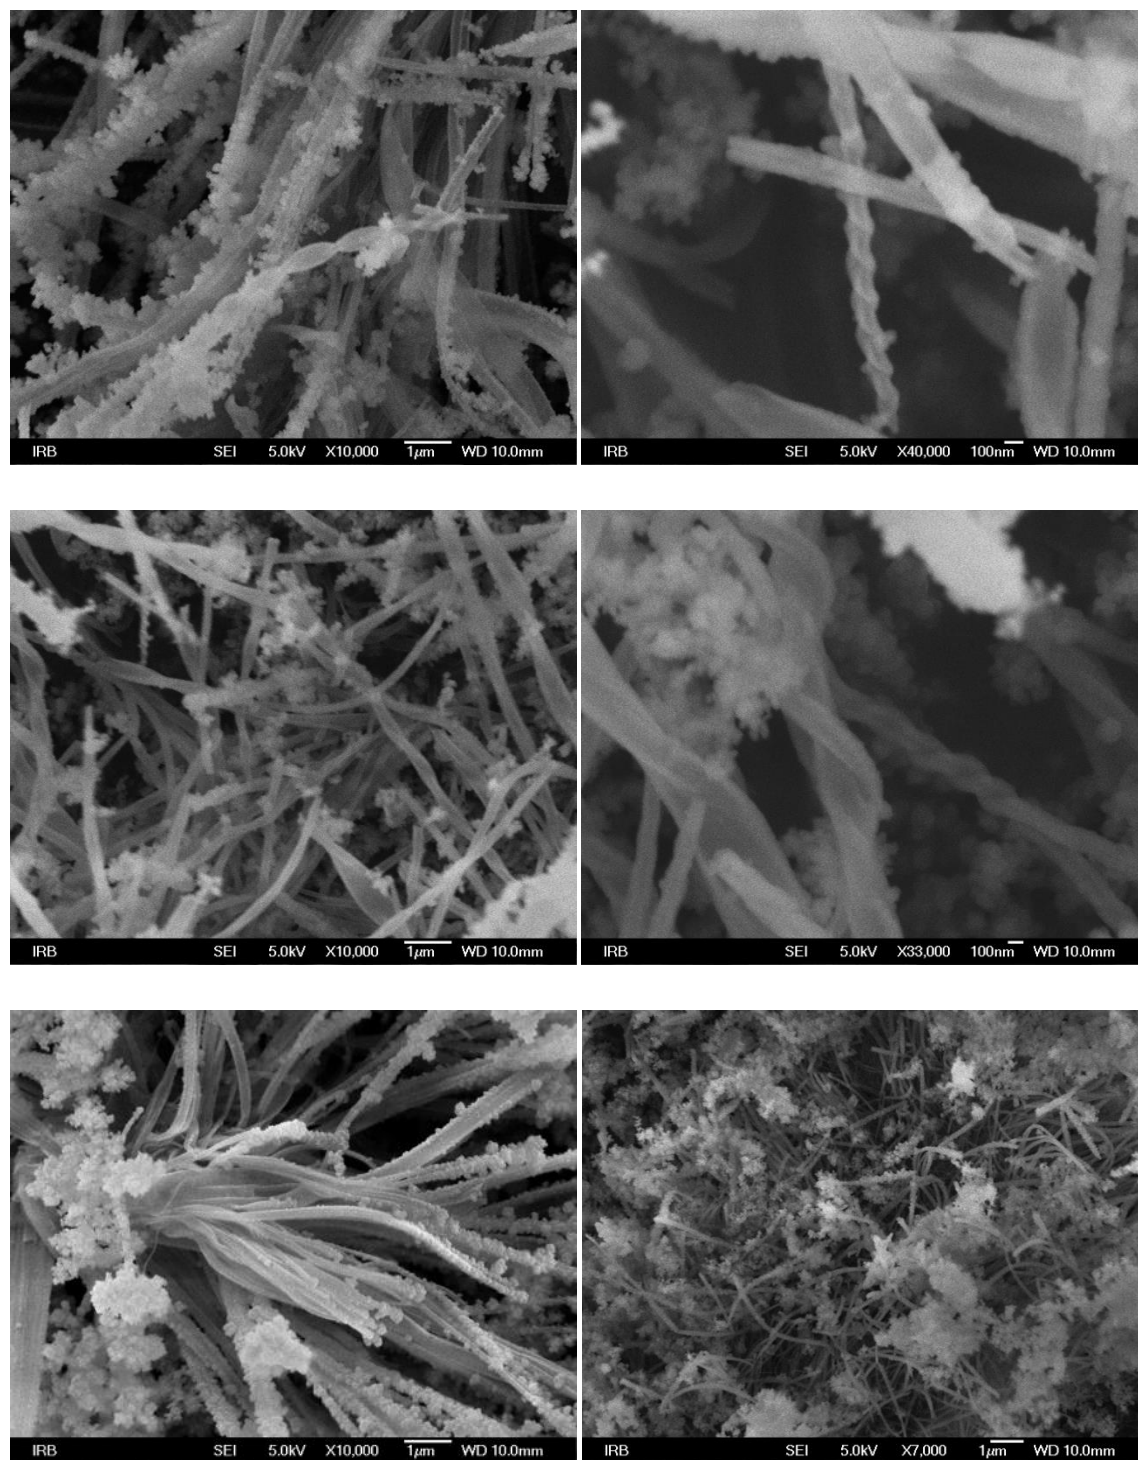

**Figure S2.** SEM micrography form obtained by gamma ray polymerization of **1a**/DMF-H<sub>2</sub>O gel network

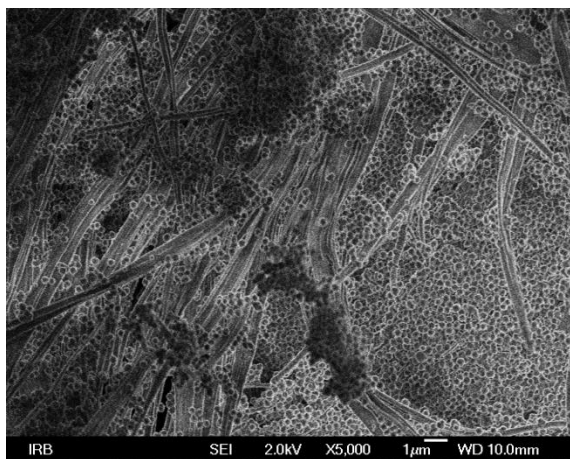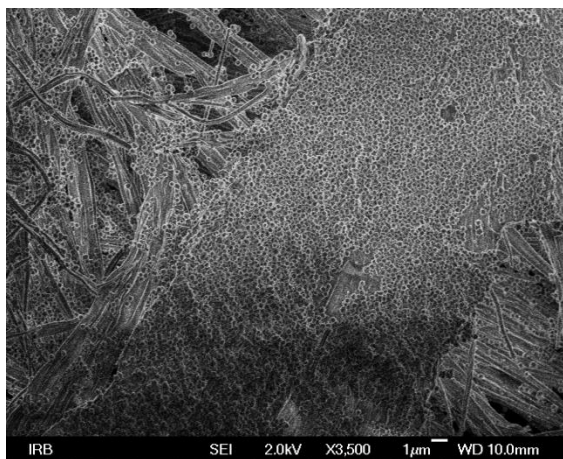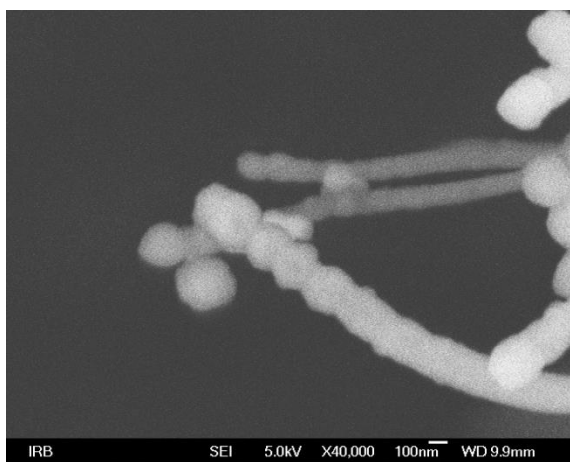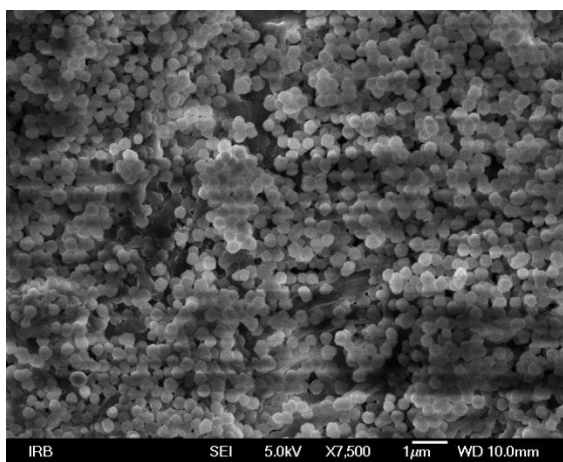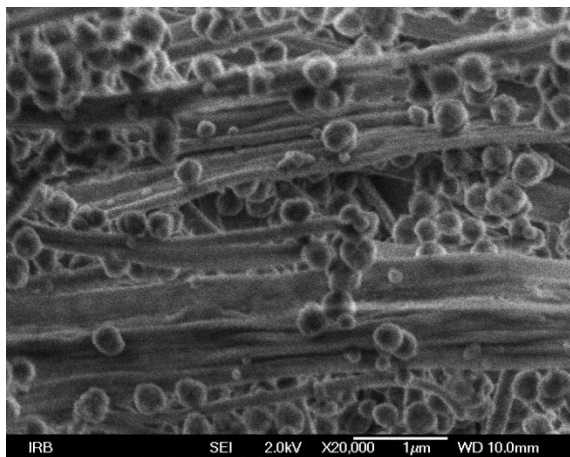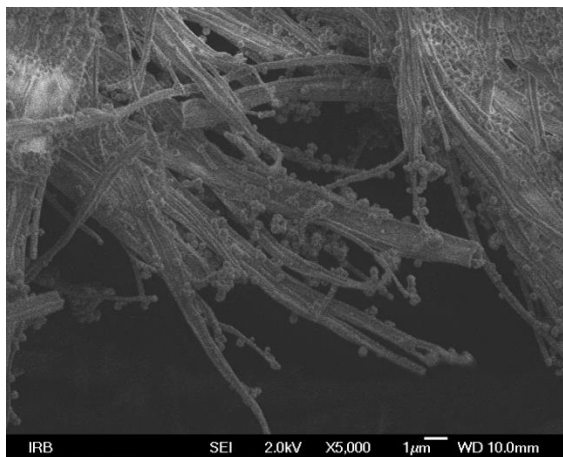

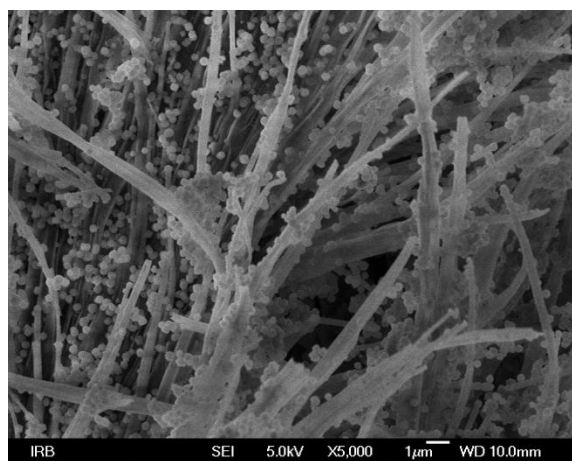

**Figure S3.** SEM micrograph of gamma ray polymerization of **1a**/DMF-H<sub>2</sub>O gel network on a glass slice

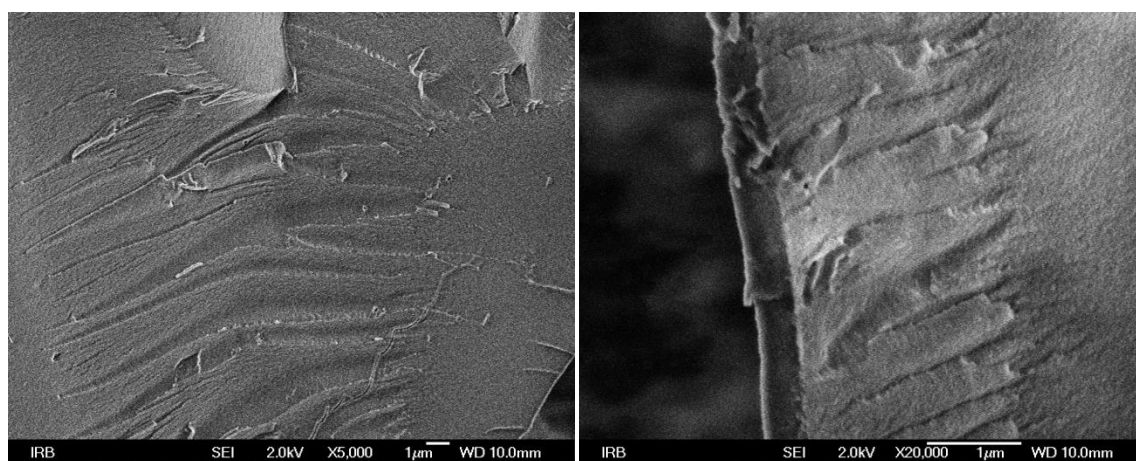

**Figure S4.** SEM micrograph of product from the gamma ray polymerization **1a**/toluene gel network

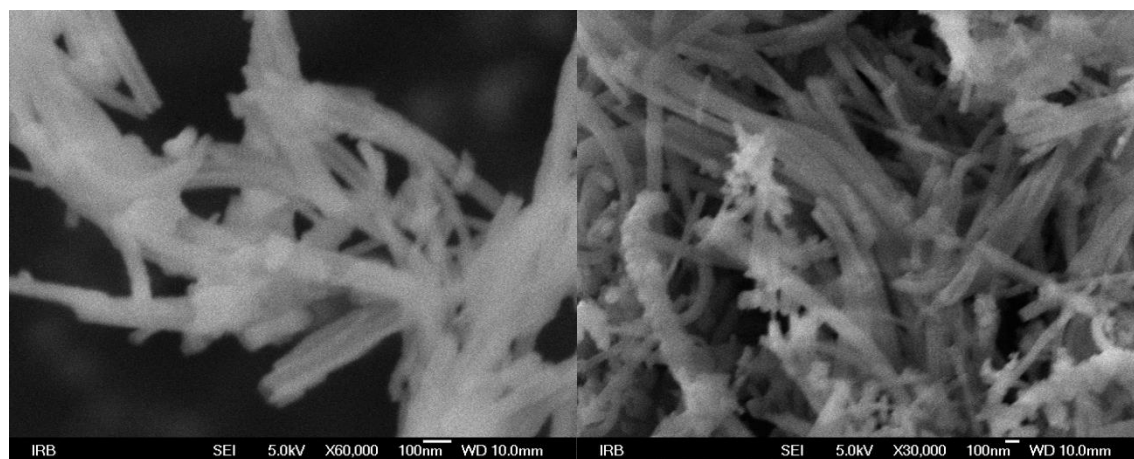



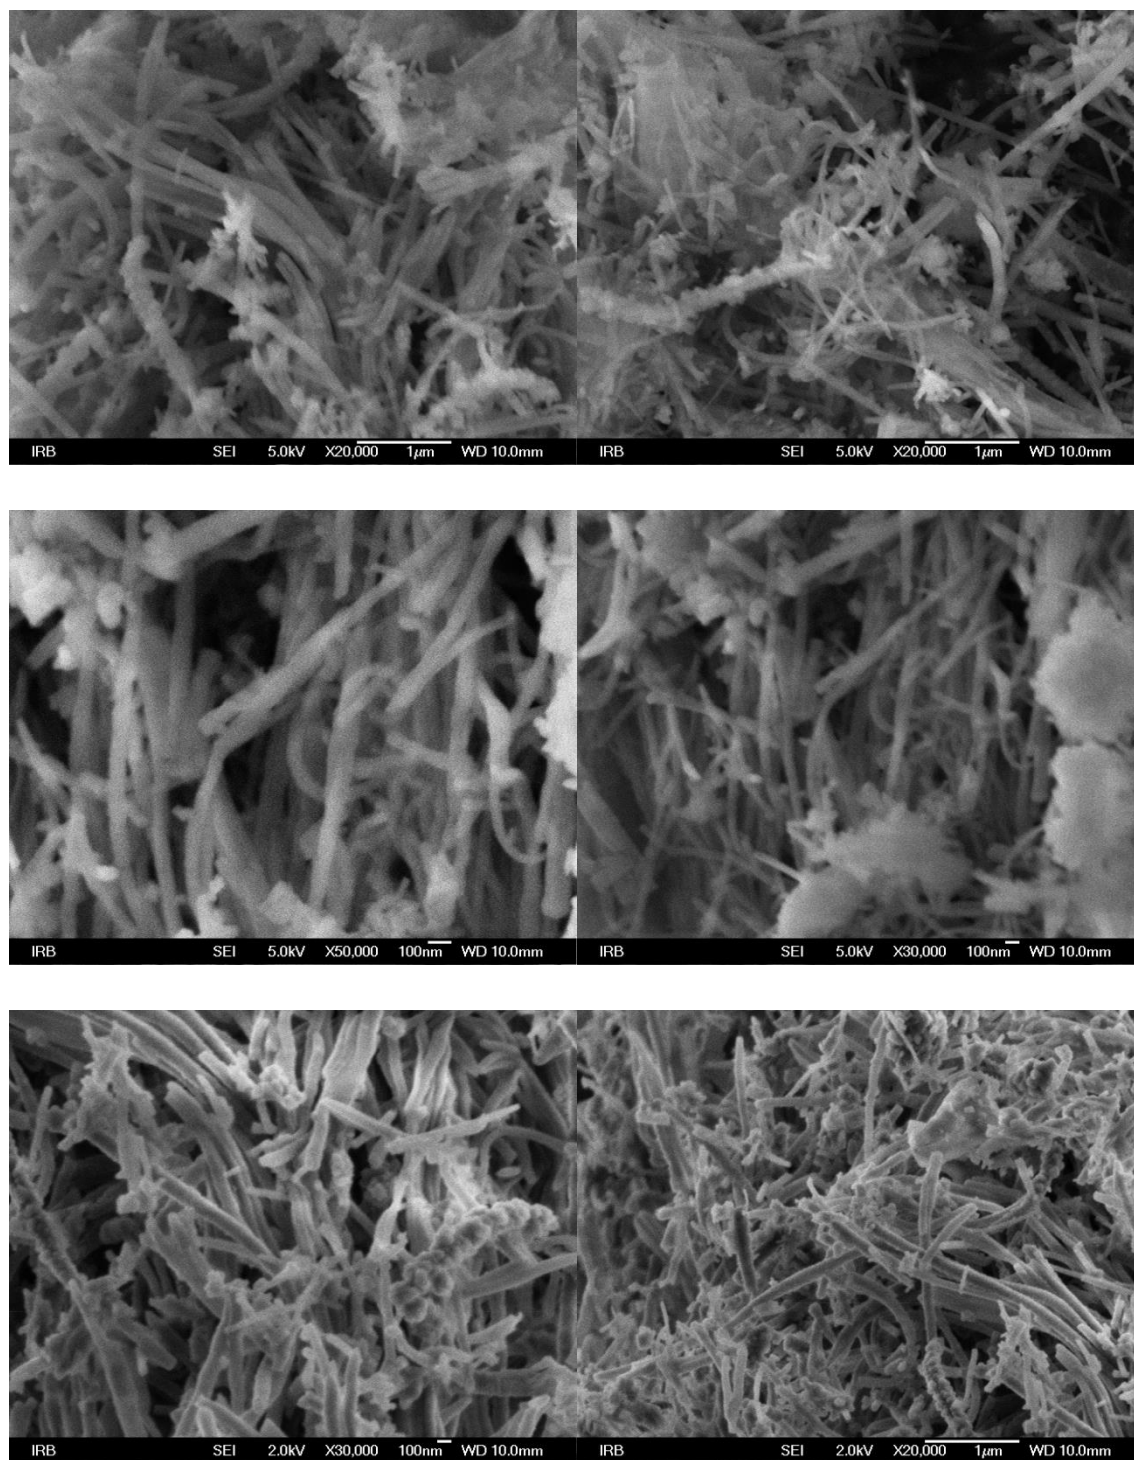

**Figure S5;** SEM micrography of UV polymerization from **1a**/DMF-H<sub>2</sub>O gel network.

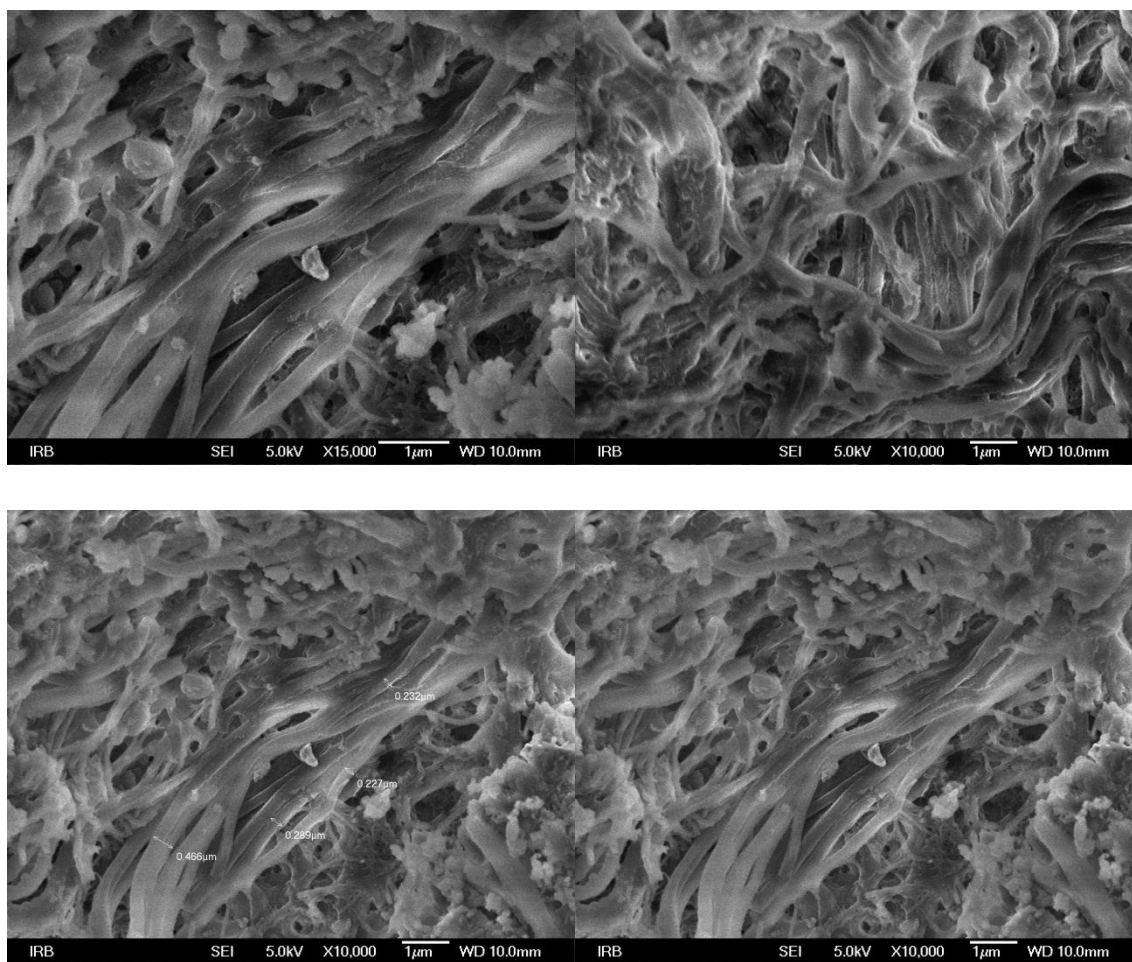

**Figure S6;** SEM micrograph of UV polymerization from **2a**/ toluen gel network

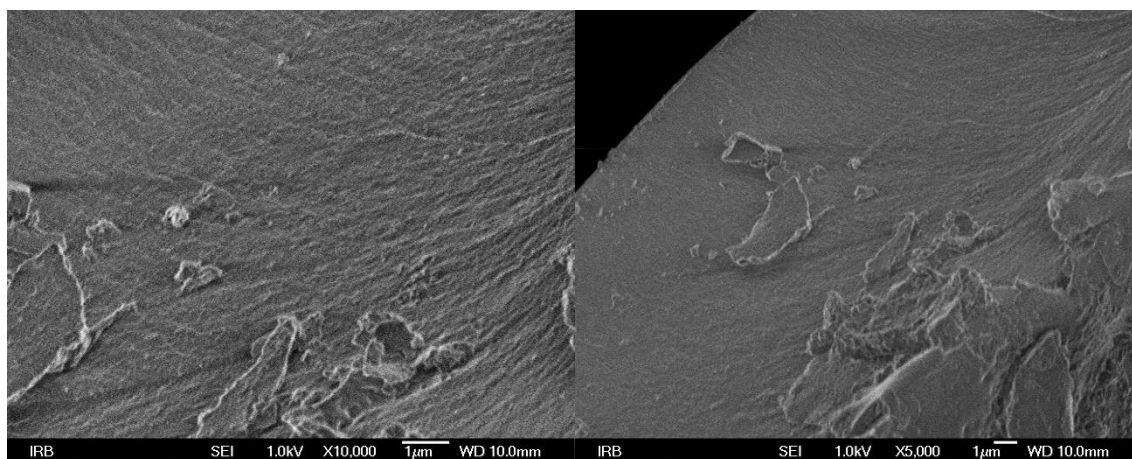

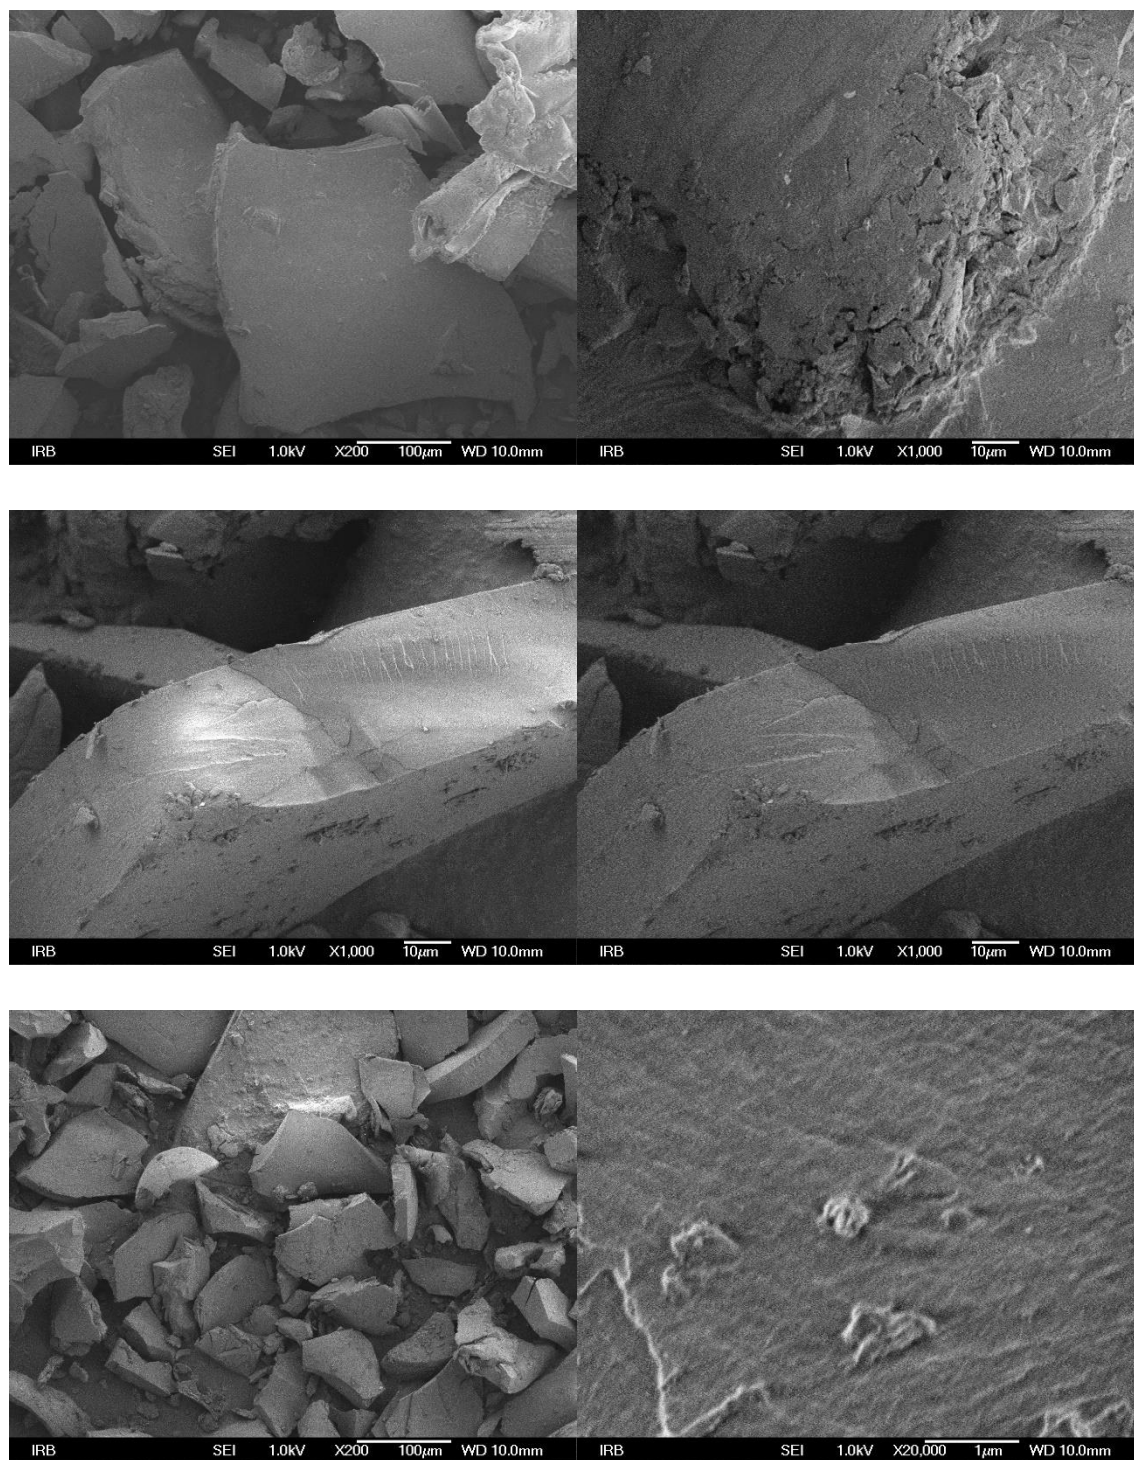

**Figure S7.** SEM micrography of UV polymerization  $\text{CH}_2\text{Cl}_2$  solution of compound **1a**

#### 4. FTIR Measurements

**Table S2;** Characteristic FTIR bands ( $\text{cm}^{-1}$ ) of **1a**, **2a** (gel, crystal, product gamma, irradiation in solution).

|                                      | <i>NH</i>    | <i>CO(OR)</i>        | <i>amide I</i> | <i>amide II</i> |
|--------------------------------------|--------------|----------------------|----------------|-----------------|
| <b>1a</b> /toluene gel               | 3385<br>3288 | 1760                 | 1647<br>1638   | solvent         |
| <b>1a</b> /crystal                   | 3317         | 1772<br>1753<br>1742 | 1645<br>1631   | 1541            |
| <b>1a</b> / $\text{CDCl}_3$ solution | 3425<br>3298 | 1751                 | 1666<br>1647   | ca 1513         |
| <b>1a</b> /toluene polymerisation    | 3367<br>3292 | 1747                 | 1647           | 1535            |
| <b>2a</b> /toluene gel               | 3291<br>3266 | 1749                 | 1635           | -               |
| <b>2a</b> /crystal                   | 3292<br>3268 | 1750                 | 1639           | 1554            |
| <b>2a</b> / $\text{CDCl}_3$ solution | 34213, 311br |                      | 1750           | 1655<br>1647    |

a)

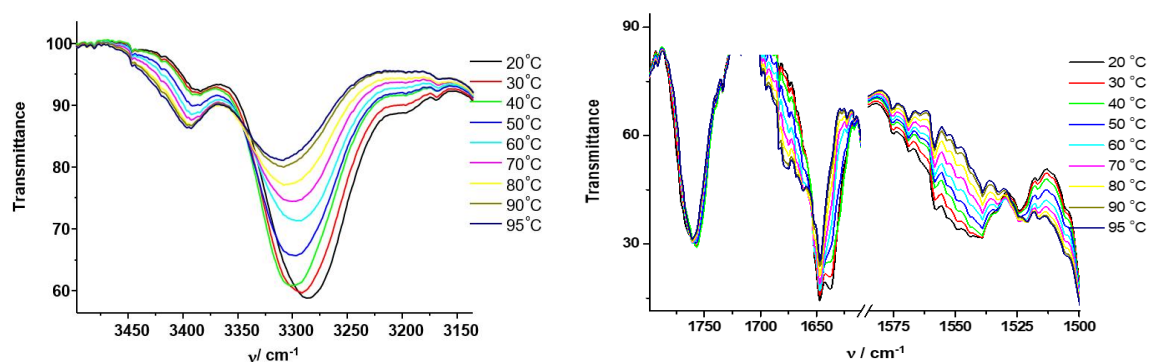

b)

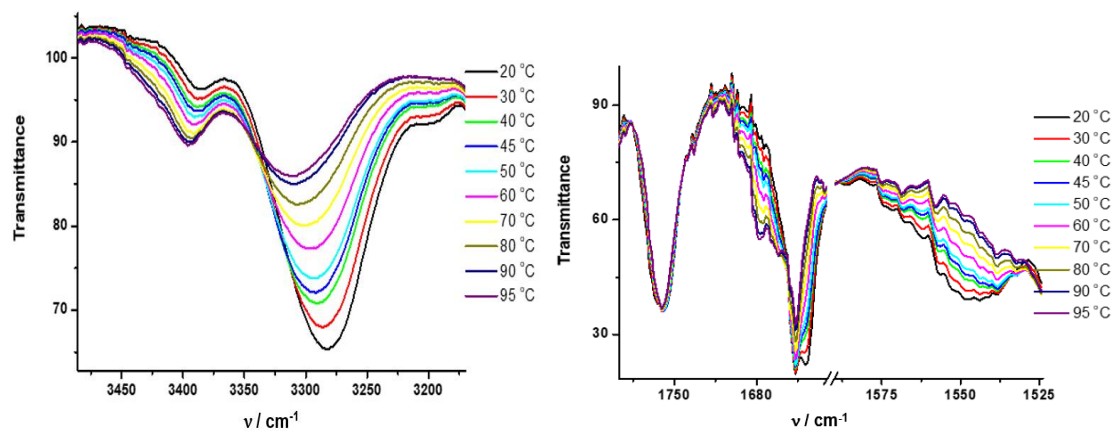

c)

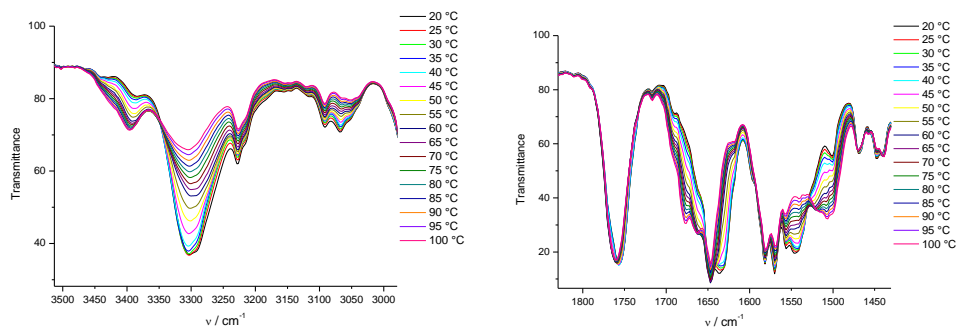

**Figure S8.** Temperature dependent FTIR spectra of a) **1a**/toluene gel (ultrasound induced gelation) b) **1a**/toluene- $d_8$  gels (without application of ultrasound) in the temperature range of 20-95 °C and c) **1a**/toluene gel with 5 % mol benzophenone in the temperature range of 20-100 °C

## 5. 2D NOESY spectra

a)

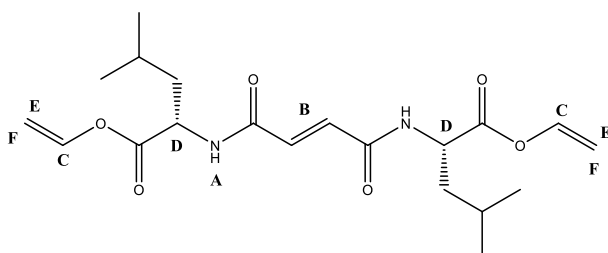

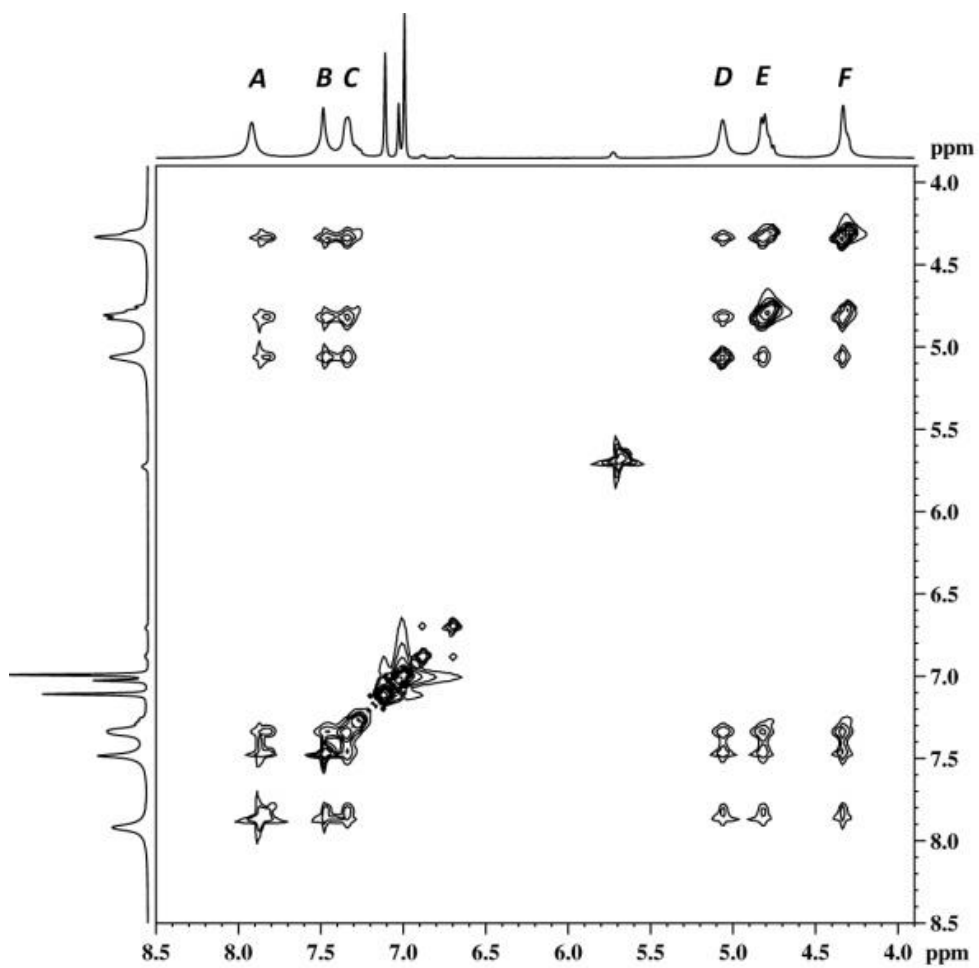

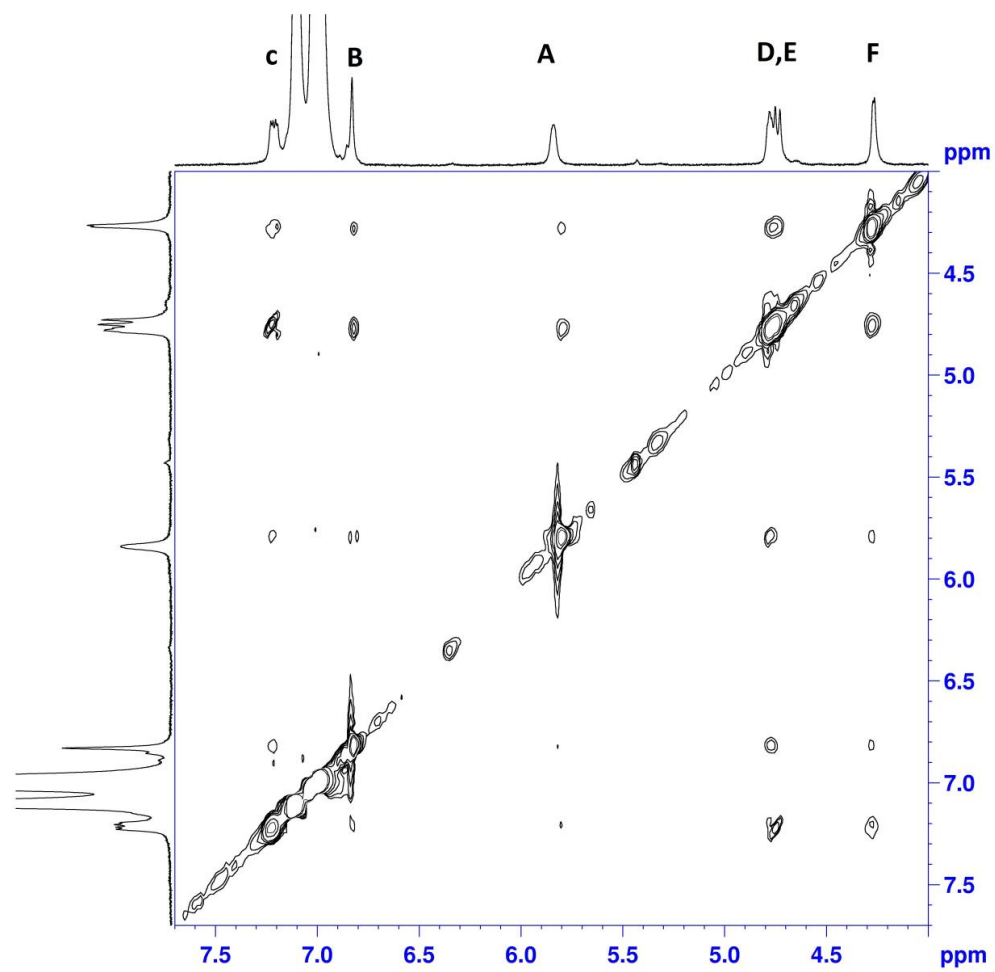

b)

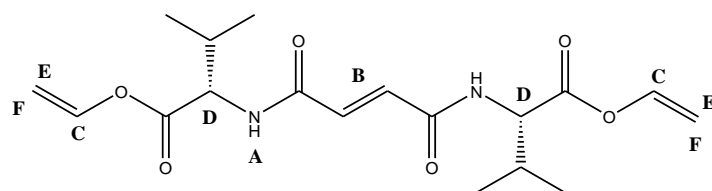

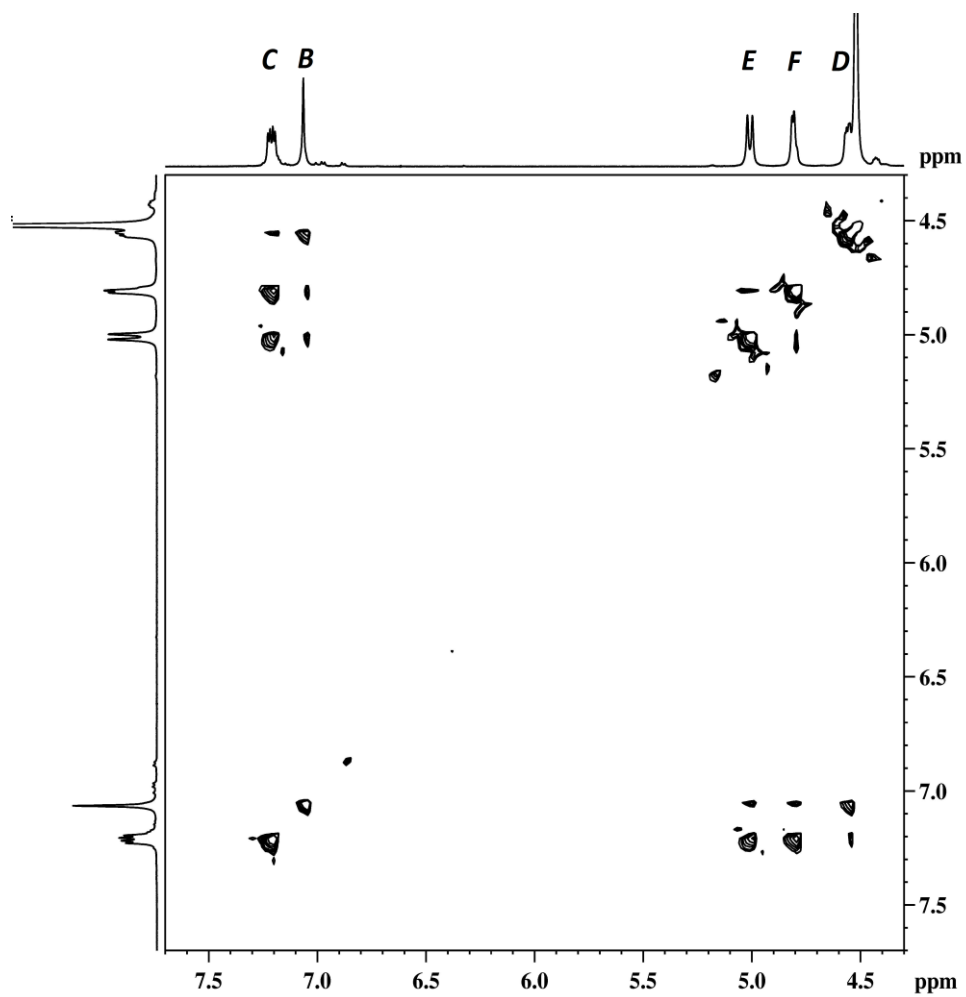



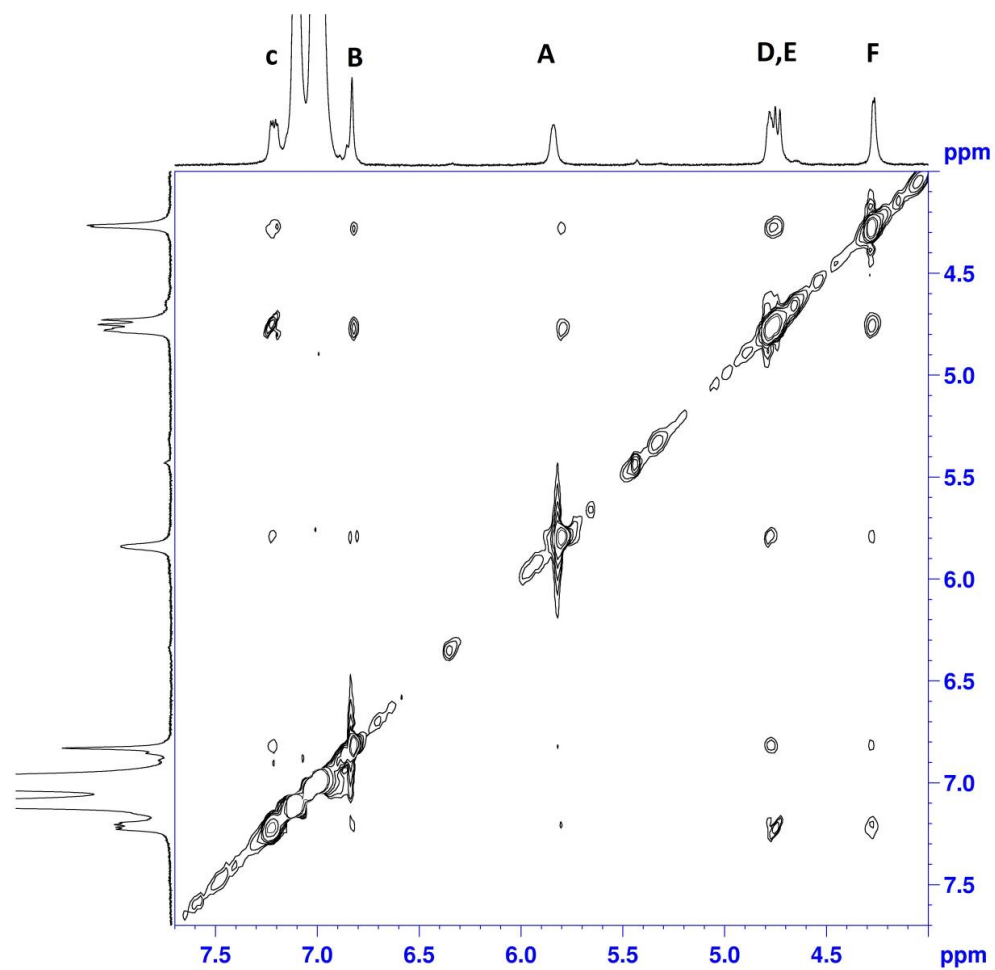

c)

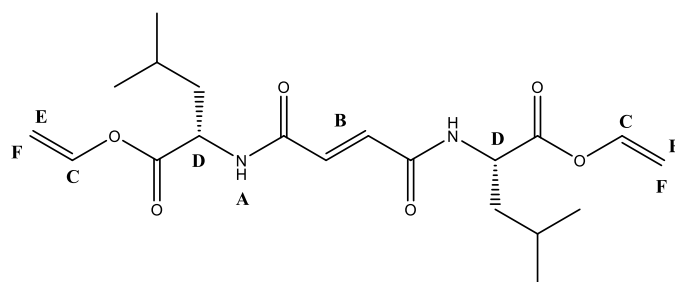

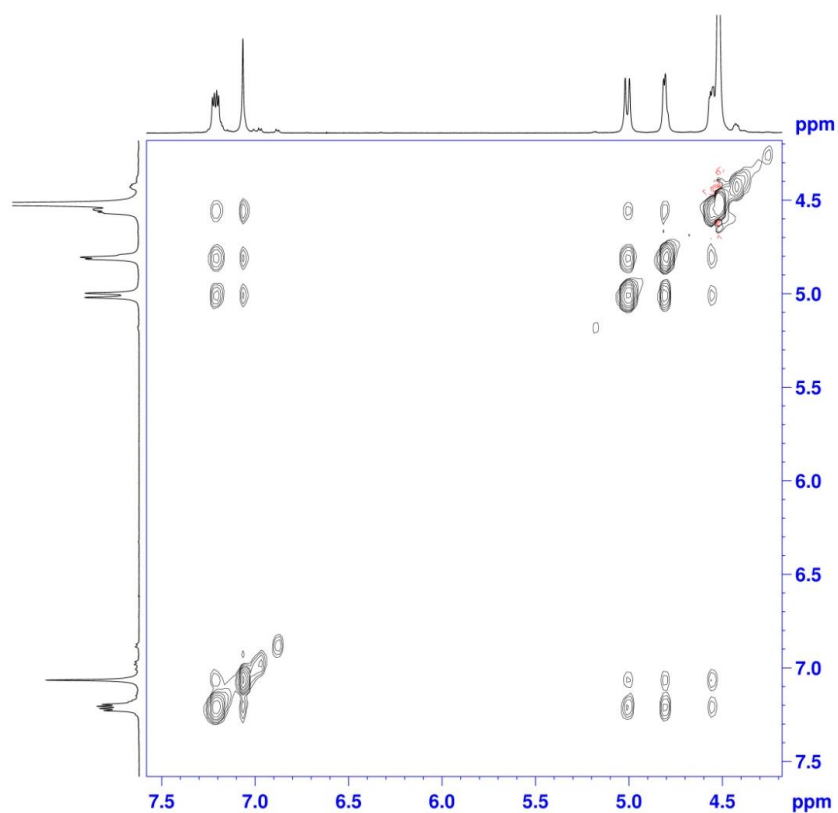

**Figure S9.** NMR; Selected region of 2D NOESY spectra of a) **1a**/toluene gel; b) **2a**/toluene gel; c) **1a**/DMF-H<sub>2</sub>O gel; [**A**=NH, **B** CH=CH<sub>(fum)</sub>, **C** O-CH=CH<sub>2</sub>, viny, **D** CH\*, **E** and **F** O-CH=CH<sub>2</sub>, vinyl protons.

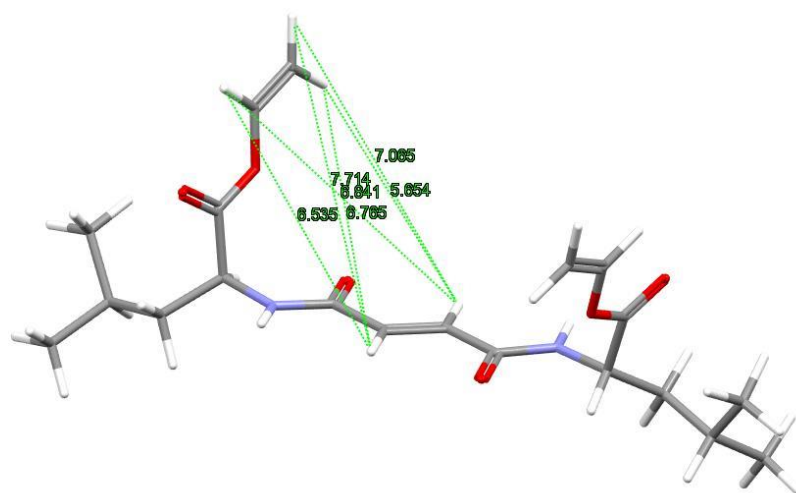

**Figure S10.** Model of **1a**. Distances H – H (vinyl ester : vinyl fum) in fully minimized the lowest energy conformations of **1a** (C – B: 6.6 – 6.8 Å; E – B: 5.6 – 6.7 Å; F – B 7.0 - 7.7 Å)

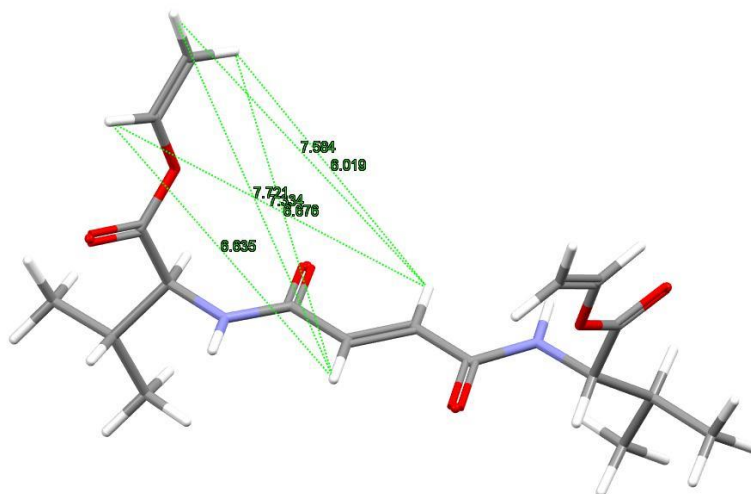

**Figure S11.** Model of **2a**. Distances H – H (vinyl ester : vinyl fum) in fully minimized the lowest energy conformations of **2a** (C – B 6.6 – 7.3 Å; E – B 6.0 – 6.3 Å; F – B 7.2 - 7.5 Å)

## 5. Molecular modelling

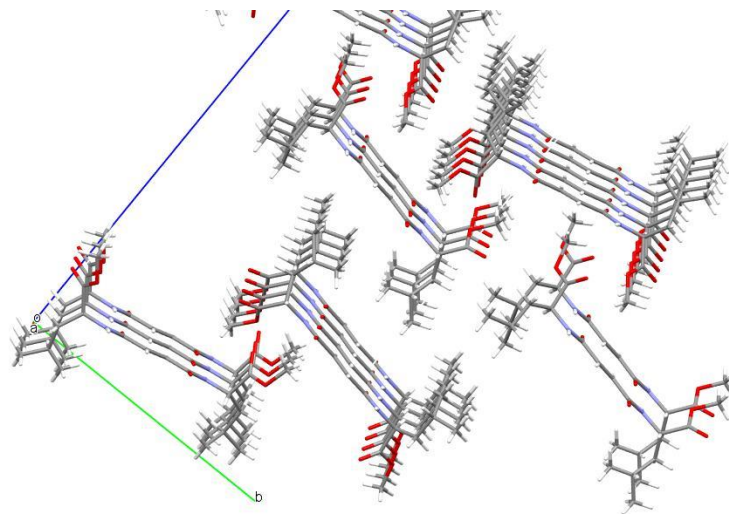

**Figure S12.** Crystal structure of *N,N'*-bis[(2*S*)-1-methoxy-3-methyl-1-oxobutane-2-yl] fumaramide (**1b**); a bilayer of molecules linked by H-bonds (1D Fum NH – O=C); 3D all *i*-Bu groups (L-Leu) are oriented towards each other, OMe groups are located on the other side of the bilayer[69].

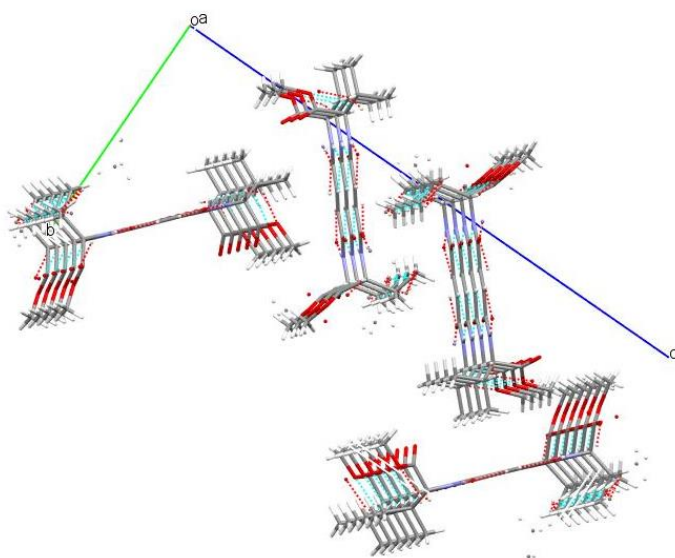

**Figure S13.** Crystal structure *N,N'*-bis[(2*S*)-1-methoxy-4-methyl-1-oxopentane-2-yl] fumaramide (**2b**) ( 1D H-bonds Fum NH – O=C); the layers are vertically oriented like a herringbone pattern, 3D *i*-Pr group (L-Val) together with OMe oriented in a “cavity”, OMe groups oriented towards to another OMe (CCDC: 2124266.).

a)

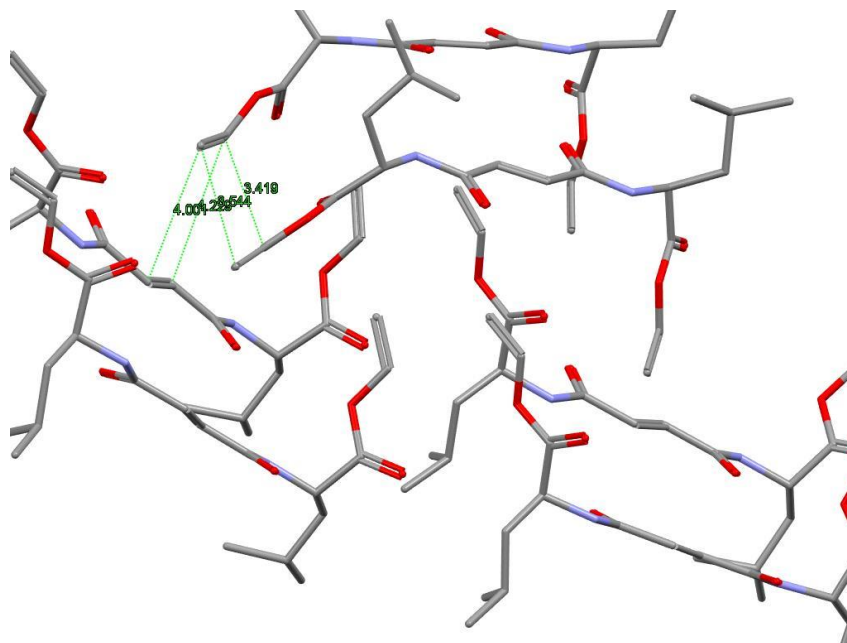

b)

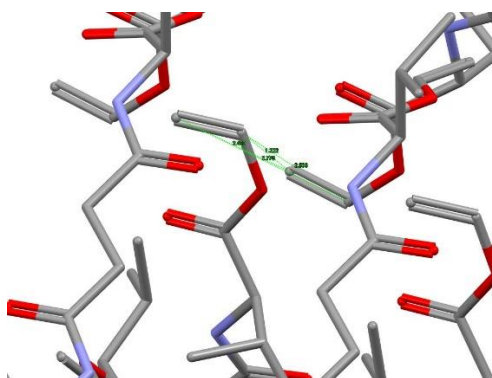

**Figure S14.** a) Distances reactive groups (C=C) under 4 Å in the model of favourable packing of the 6 molecules linked by amide H-bonds (NH-O = C) (**1a**) obtained by molecular modelling. Hydrogen atoms are omitted for clarity. b) enlarged part of the structure.

a)

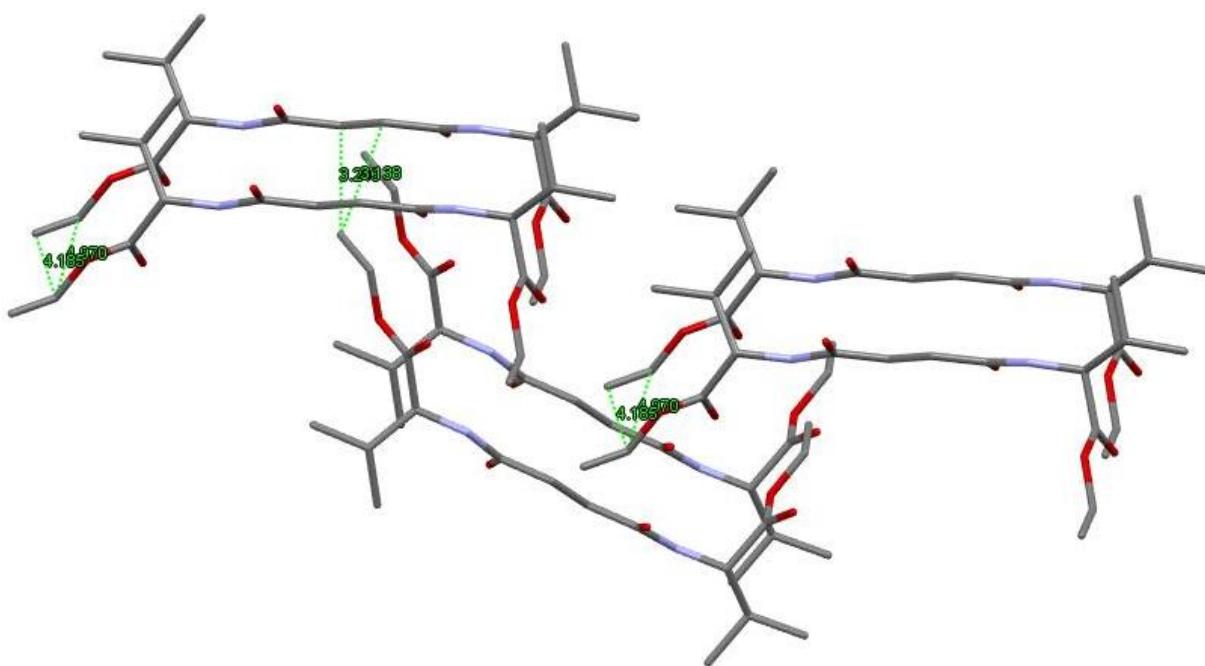

b)

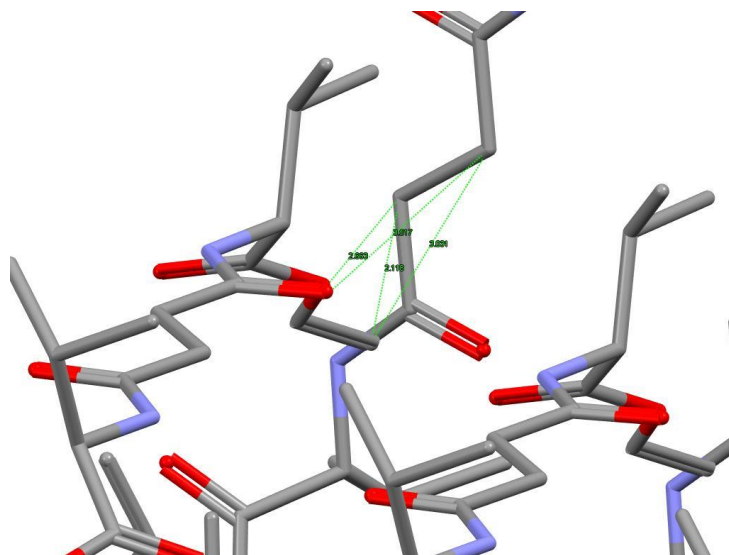

**Figure S15.** Distances reactive groups (C=C)  $\sim 4$  Å in the model of favourable packing of the 6 molecules linked by amide H-bonds (NH-O = C) (**2a**) obtained by molecular modelling. Hydrogen atoms are omitted for clarity. b) enlarged part of the structure.

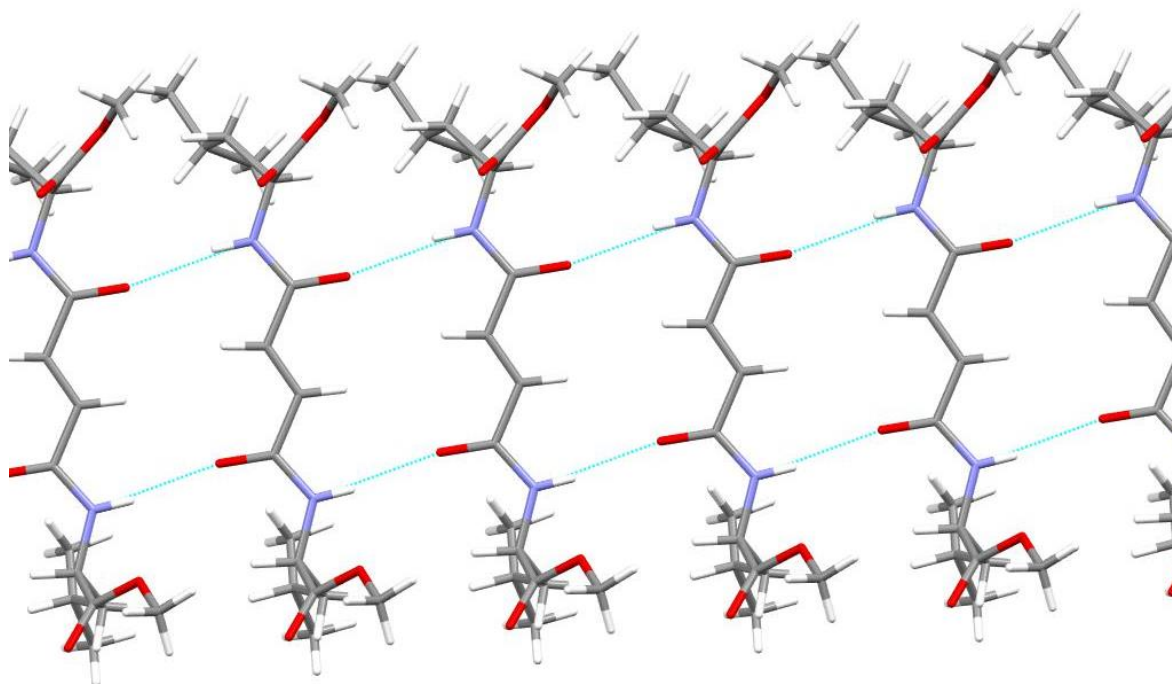

**Figure S16.** Hydrogen bond pattern in crystal structure of *N,N'*-bis[(2*S*)-1-methoxy-3-methyl-1-oxobutane-2-yl]fumaramide (**1b**).[69]

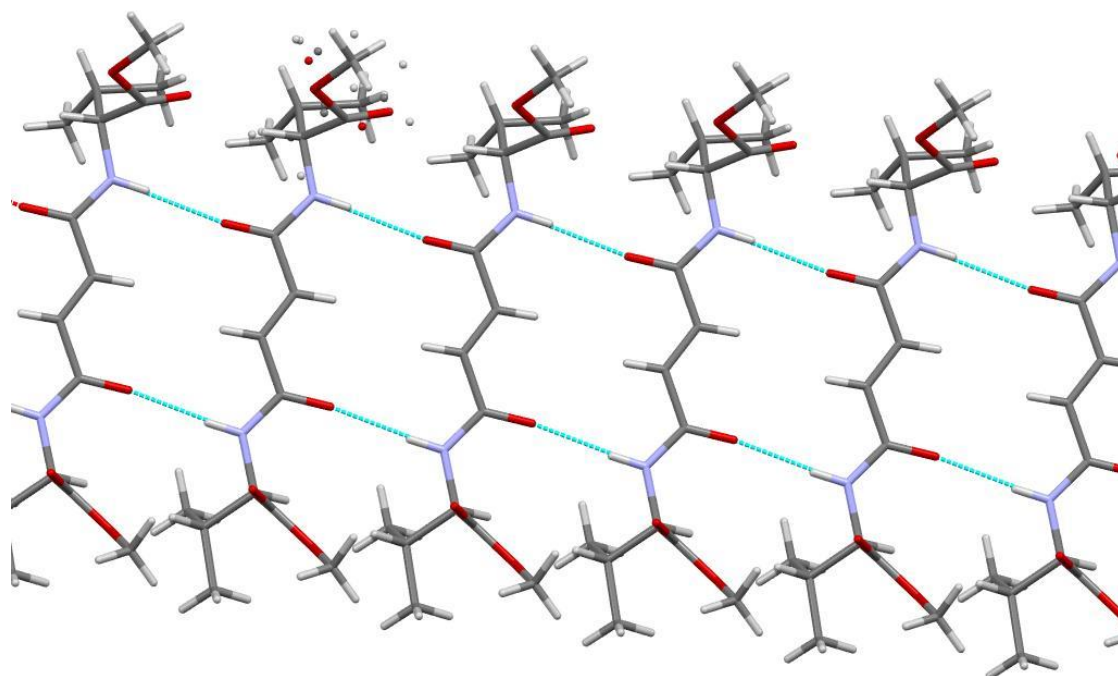

**Figure S17.** Hydrogen bond pattern in crystal structure of *N,N'*-bis[(2*S*)-1-methoxy-4-methyl-1-oxopentane-2-yl]fumaramide (**2b**), (CCDC: 2124266).

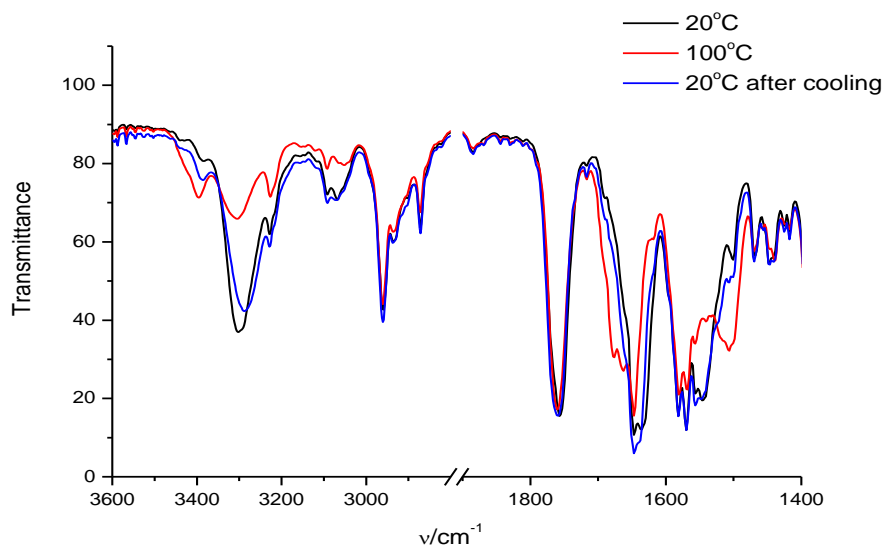

**Figure S18** Temperature FTIR spectra **1a**/toluene- $d_8$  ( $c = 0.23$  M) before heating (black) at 100 °C (red) and after cooling (blue)

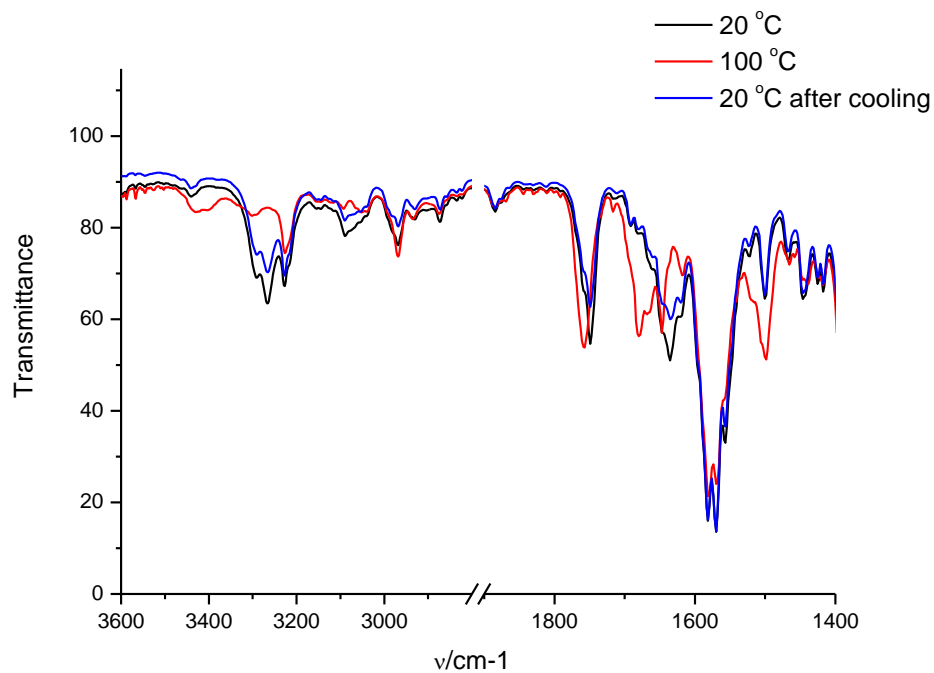

**Figure S19** Temperature FTIR spectra **2a**/toluene- $d_8$  ( $c = 4.2 \times 10^{-2}$  M) gels) before heating (black) at 100 °C (red) and after cooling (blue)



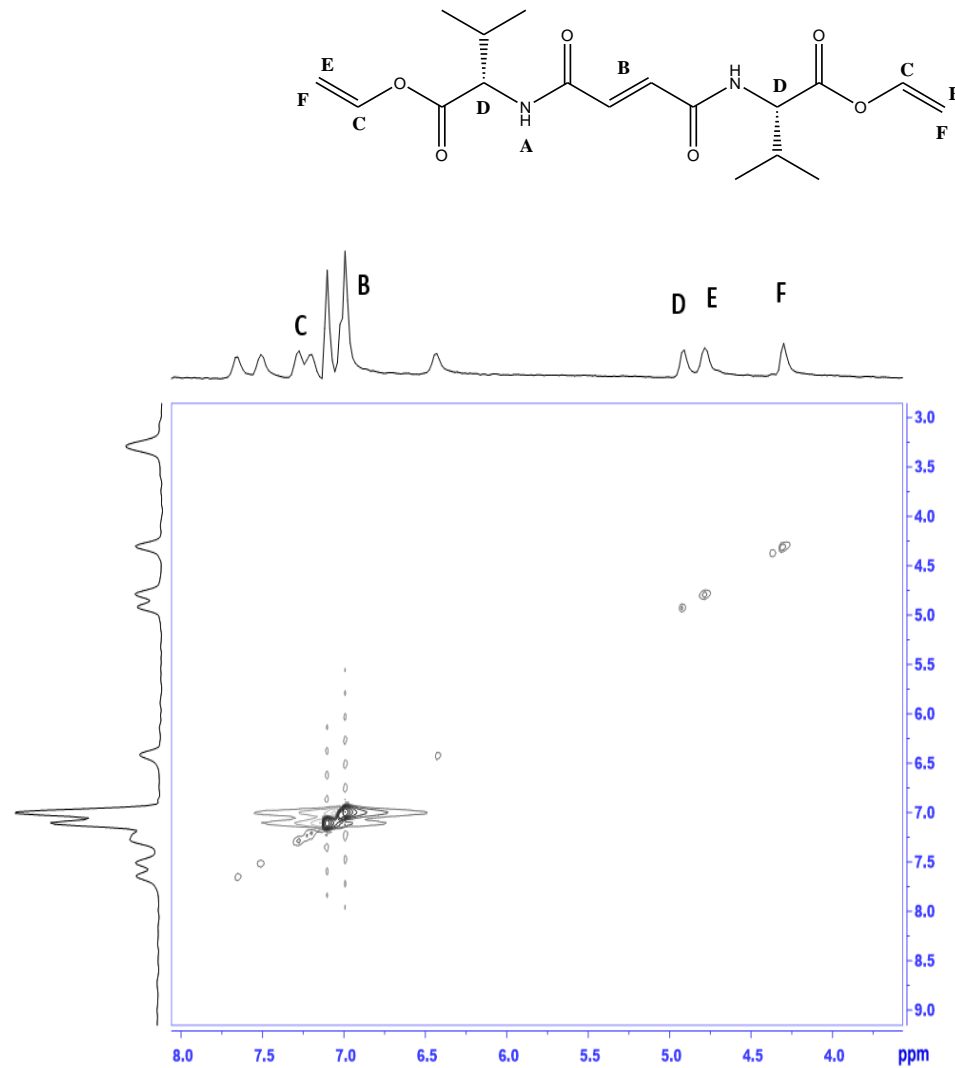

**Figure S20.** Selected region of 2D NOESY spectra of **2a**/toluene gel at 40 °C; [**A**=NH, **B** CH=CH<sub>(fum)</sub>, **C** O-CH=CH<sub>2</sub>, viny, **D** CH\*, **E** and **F** O-CH=CH<sub>2</sub>, vinyl protons
